# Supplementary material for: Genome Patterns of Selection and Introgression of Haplotypes in Natural Populations of the House Mouse (Mus musculus)
Source: PLoS Genet. 2012 Aug 30;8(8):e1002891. doi: 10.1371/journal.pgen.1002891 (PMC3431316; doi:10.1371/journal.pgen.1002891)
Supplement: Table S2 — Gene Ontology (GO) over-representation analysis for sweep gene lists. (XLSX) [file pgen.1002891.s004.xlsx]

## Sheet: comments
supplementary Table S2
Gene Ontology (GO) over-representation analysis for sweep gene lists
Output of FuncAssociate 2.0 ( http://llama.mshri.on.ca/funcassociate/) for the gene lists derived for the different statistics (sheet names include population name and statistics applied)
the left columns represent parameters of the output,including significantly enriched GO categories at the bottom
the right colums represent the gene lists tested (all genes overlapping with the respective significant window form the statistics) and their representation in the overrepresented category, whee applicable
"no results" means that there is no overrepresented GO category

## Sheet: Ger XPCLR
no results		Ptp4a3
		Exd1
		Dll4
		Fam69a
		Ovol1
		Gm962
		Thsd7b
		Ptprv
		Ptpn7
		Arl8a
		Gpr37l1
		Cacna1s
		BC115961
		Kif21b
		Sf3b5
		Plagl1
		Fam164b
		Ltv1
		Phactr2
		Fam13c
		Bicc1
		AI646023
		Ggt1
		Ggt5
		Susd2
		Cabin1
		Nup37
		Ccdc53
		Armc7
		Nt5c
		Hn1
		Sumo2
		Nup85
		BC048080
		Dnmt3a
		Dnajc27
		Adcy3
		Rhob
		AK192194
		AK050516
		Immp2l
		Frmd6
		Actr10
		Psma3
		AK014224
		Arid4a
		2700049A03Rik
		Gphn
		Mirg
		AK014028
		Dio3os
		Dio3
		Ppp2r5c
		Rcor1
		Traf3
		Adarb2
		Ryr2
		Lyst
		Hecw1
		Agtr1a
		Irf4
		BC075635
		Exoc2
		Sfxn1
		Hrh2
		Ankrd55
		Il6st
		Il31ra
		Bmpr1a
		9230112D13Rik
		Ldb3
		Opn4
		Grid1
		Nrg3
		D14Ertd668e
		Diap3
		Itgbl1
		Csmd3
		Gpr20
		Gm628
		Syt10
		Slc2a13
		Lrrk2
		Rbfox1
		Snai2
		Sema5b
		Dirc2
		Hspbap1
		Parp14
		Dtx3l
		Parp9
		AK144265
		Kpna1
		Wdr5b
		Fam162a
		Csta
		Stfa2l1
		Gm5483
		Gm5416
		2010005H15Rik
		Tmem39a
		Arhgap31
		B4galt4
		Upk1b
		4930435E12Rik
		Igsf11
		AK015072
		Itgb2l
		Pacrg
		AK038428
		AK137341
		Park2
		Tcp1
		Acat3
		Acat2
		Wtap
		Sod2
		AK144664
		Crim1
		Snx24
		Ppic
		Prdm6
		Cep120
		Csnk1g3
		Rps14
		Cd74
		Tcof1
		Camk2a
		Slc6a7
		Cdx1
		Pdgfrb
		Csf1r
		Hmgxb3
		Slc26a2
		Pde6a
		AK210533
		Ppargc1b
		Tcf4
		Dcc
		Slc14a2
		Setbp1
		4930481A15Rik
		Drap1
		AI837181
		Fosl1
		Fibp
		Ctsw
		Mus81
		Cfl1
		Snx32
		1700020D05Rik
		Rnaseh2c
		Kat5
		Rela
		Sipa1
		Pcnxl3
		Map3k11
		Kcnk7
		Ehbp1l1
		Mtvr2
		Sssca1
		Ltbp3
		Scyl1
		Malat1
		AK215842
		Frmd8
		Slc25a45
		Tigd3
		Dpf2
		Cdc42ep2
		Pola2
		Slc22a20
		AK160921
		Syvn1
		Mrpl49
		Fau
		Znhit2-ps
		Tm7sf2
		1110014N23Rik
		BC048609
		Zfpl1
		Cdca5
		Gm550
		Naaladl1
		Sac3d1
		Snx15
		Arl2
		Batf2
		Gpha2
		Ppp2r5b
		Atg2a
		Lipm
		Ankrd22
		Mllt10
		Dnajc1
		Commd3
		Bmi1
		BC061194
		Pip4k2a
		AK030770
		Lcn4
		Vav2
		BC094334
		Brd3
		Kif5c
		Lypd6b
		Galnt13
		Lrp2
		Slc5a12
		Muc15
		Muc15
		4930430A15Rik
		Olfr1275
		Olfr1276
		Olfr1277
		Olfr1278
		Olfr1279
		Olfr1280
		Olfr1281
		Olfr1282
		Olfr1283
		Olfr1284
		Olfr1286
		Olfr1287
		Olfr1288
		Olfr1289
		Olfr1290
		Olfr1294
		Olfr1295
		Olfr1297
		Olfr1298
		Olfr1299
		Olfr1300-ps1
		Olfr1301
		Olfr1302
		Olfr1303
		Olfr1305
		Olfr1306
		Olfr1307
		Olfr1308
		Olfr1309
		Olfr1310
		Olfr1311
		Olfr1312
		Olfr1313
		Olfr1314
		Olfr1316
		Rad51
		Fam82a2
		Gchfr
		Dnajc17
		Gm14137
		Zfyve19
		Ppp1r14d
		Spint1
		Rhov
		Vps18
		Gm14207
		Chac1
		Ino80
		1500003O03Rik
		1700020I14Rik
		Oip5
		Nusap1
		Ndufaf1
		Rtf1
		Itpka
		Ltk
		Rpap1
		Tyro3
		Mga
		Ovol2
		Csrp2bp
		Spata16
		Tmem212
		Atp11b
		Dcun1d1
		Mccc1
		A330050B17Rik
		Ccdc144b
		Acad9
		D3Ertd254e
		Qrfpr
		Nudt6
		Spata5
		Frem2
		AK050510
		Ufm1
		AK081086
		Trpc4
		Ube2v1
		AK141565
		AK140632
		Rhbg
		1700021C14Rik
		Cct3
		Anp32e
		AK028005
		Plekho1
		Vps45
		Otud7b
		Mtmr11
		Sf3b4
		Sv2a
		Bola1
		Hist2h2ab
		Hist2h2ac
		Hist2h2be
		Hist2h3c1
		Hist2h2aa2
		4933421E11Rik
		Cd53
		Slc16a4
		Rbm15
		Gstm7
		Gstm6
		Gstm3
		Gstm2
		Rab2a
		Sit1
		Rmrp
		Ccdc107
		E130306D19Rik
		Car9
		Tpm2
		Tln1
		Creb3
		Gba2
		Rgp1
		Msmp
		Tmem8b
		Olfr71
		Hrct1
		5430416O09Rik
		AK087201
		Olfr159
		Olfr156
		Olfr157
		Olfr155
		Glipr2
		Gne
		Rnf38
		Frmd3
		Elavl2
		AK136146
		Cd36
		Gnat3
		Fam185a
		Cds1
		Wdfy3
		Tgfbr3
		Brdt
		Ephx4
		A830010M20Rik
		1700028K03Rik
		Glmn
		Rpap2
		AK042124
		AK037419
		Gfi1
		AK146255
		Evi5
		Ube2d2
		Msi1
		Pla2g1b
		Sirt4
		Pxn
		Rpl6
		Gm15800
		Cntnap2
		St3gal5
		AK016225
		AK039589
		C87436
		AK052590
		AK009724
		AK079912
		Pcbp1
		BC029726
		Ttll3
		Rpusd3
		Cidec
		Jagn1
		Il17re
		Il17rc
		Creld1
		Cacna1c
		Dcp1b
		Gabrb3
		Otud7a
		Prc1
		Rccd1
		Unc45a
		Hddc3
		Man2a2
		Fes
		Furin
		Blm
		Crtc3
		AK155169
		AK011897
		Gtf3c1
		D430042O09Rik
		Gsg1l
		Xpo6
		AK043947
		Sbk1
		Lat
		Spns1
		Nfatc2ip
		Cd19
		Rabep2
		Atp2a1
		Btbd16
		Plekha1
		1810011O10Rik
		Anxa10
		Eps15l1
		Calr3
		1700030K09Rik
		Large
		Vps35
		Orc6
		Mylk3
		4921524J17Rik
		Gpt2
		Dnaja2
		Neto2
		Itfg1
		AK085761
		Phkb
		Fto
		Sipa1l2
		Neo1
		Adpgk
		Bbs4
		Arih1
		AK138089
		Tmem202
		Hexa
		AK076865
		Dtnb
		Nrxn3
		Rian
		AF357359
		AF357355
		Mir882
		Mir379
		Mir411
		Mir299
		Mir380
		Mir1197
		Mir323
		Mir758
		Mir329
		Mir494
		Mir679
		Mir1193
		Mir666
		Mir543
		Mir495
		Mir667
		Mir376c
		Mir654
		Mir376b
		Mir376a
		Mir300
		Mir381
		Mir487b
		Mir539
		Mir453
		Mir154
		Mir496
		Mir377
		Mir541
		Mir409
		Mir3072
		AB352963
		Drd1a
		Gm4902
		Setdb2
		Ccdc58
		Snora20
		AB352058
		Ccdc85b
		Efemp2
		Neat1
		AK009639
		Capn1
		1700123I01Rik
		Fam69b
		Snora17
		Ano3
		Mir3093
		Mir9-1
		AK142077
		Olfr70
		Olfr155
		Reck
		Gm12633
		Fbxl13
		Vps33b
		Vmn2r69
		Vmn2r70
		Vmn2r71
		Vmn2r72-ps
		Vmn2r73
		Vmn2r74
		Il21r
		Sox14

## Sheet: Ger Rsbl
# species: Mus musculus											GO:0007155	GO:0022610	GO:0005886
# support: EXP, IMP, ISS, ISM, TAS, IEA, IDA, IGI, ISO, IGC, NAS, IPI, IEP, ISA, RCA, IC										Tgfa	0	0	0
# associations retrieved on: 2012-01-12 15:43:44-05										Samd4b	0	0	0
# gofunc built on: 2011-09-27 00:14:12.081902-04										Exd1	0	0	0
# gene associations file: ftp://ftp.geneontology.org/pub/go/gene-associations/gene_association.mgi.gz										4930426L09Rik	0	0	0
# revision: 1.888										Rhbdl2	0	0	1
# downloaded on: 2011-09-26 20:52:45-04										Slc26a9	0	0	0
# GO DAG files from: http://archive.geneontology.org/latest-full/go_201109-assocdb-tables.tar.gz										Epha6	0	0	0
# downloaded on: 2011-09-14 13:37:39-04										Vwa3b	0	0	0
# translation required: yes										Add2	0	0	1
# translation info:										Nfatc2	0	0	1
# authority: ensembl										Dll4	0	0	0
# synergizer db built on: 2011-09-13 18:29:21.292355-04										Skil	0	0	0
# synergizer db built from: Ensembl Genes 63 / Ensembl Metazoa Genes 10 / Ensembl Plants Genes 10										Nfkbib	0	0	0
# namespace: mgi_symbol										Nbas	0	0	0
# coverage: 99.9%										Fam154a	0	0	0
# size of "genespace": 25067										Chrm4	0	0	1
# number of attributes: 14615										D630037F22Rik	0	0	0
# NOTE: the last record consists of all the entities in the										Cdkal1	0	0	0
# "genespace" that are not associated with any attribute (for										Npas3	0	0	0
# the requested support).										Olfr746	0	0	0
# Original number of entities in query: 1039										Hs1bp3	0	0	0
# Number of entities in query: 1029										Ptpru	1	1	1
# Total number of entities: 25245										2610203C20Rik	0	0	0
# Original total number of entities: 25067										Fam163b	0	0	0
# Entities not in default gene space: 178										Ralgapb	0	0	0
# Total number of attributes: 14615										Rrs1	0	0	0
# Translation required: yes										Adhfe1	0	0	0
# Translation coverage: 0.998909										2610203C22Rik	0	0	0
# Mode: unordered										2610203C22Rik	0	0	0
# Number of simulations: 1000										3110035E14Rik	0	0	0
# Adjusted P-value cutoff: 0.05										Mybl1	0	0	0
# Over/under: over										Vcpip1	0	0	0
# Evidence codes: EXP, IMP, ISS, ISM, TAS, IEA, IDA, IGI, ISO, IGC, NAS, IPI, IEP, ISA, RCA, IC										Cpa6	0	0	0
OVERREPRESENTED ATTRIBUTES										AK050085	0	0	0
N	X	LOD	P	P_adj	attrib ID	attrib name				Tmem131	0	0	0
48	574	0.347027	2.30807e-06	0.003	GO:0007155	cell adhesion				Cnga3	0	0	1
48	580	0.341996	3.0723e-06	0.005	GO:0022610	biological adhesion				Inpp4a	0	0	0
147	2598	0.171414	2.38122e-05	0.049	GO:0005886	plasma membrane				AK019601	0	0	0
										6330578E17Rik	0	0	0
										Unc50	0	0	0
										Mgat4a	0	0	0
										Col3a1	1	1	0
										Col5a2	0	0	0
										DQ705824	0	0	0
										AK016177	0	0	0
										1700066M21Rik	0	0	0
										1110034B05Rik	0	0	0
										9430016H08Rik	0	0	0
										Gm973	0	0	0
										AK006768	0	0	0
										Spag16	0	0	0
										Vwc2l	0	0	0
										DQ564750	0	0	0
										DQ559597	0	0	0
										DQ696253	0	0	0
										DQ726158	0	0	0
										DQ549908	0	0	0
										Thsd7b	0	0	0
										Srgap2	0	0	0
										Fam72a	0	0	0
										Avpr1b	0	0	1
										Ctse	0	0	0
										Ctse	0	0	0
										5430435G22Rik	0	0	0
										Pm20d1	0	0	0
										Slc41a1	0	0	0
										Rab7l1	0	0	0
										AB349695	0	0	0
										Mdm4	0	0	0
										Ppp1r15b	0	0	0
										Plekha6	0	0	0
										AK145464	0	0	0
										Golt1a	0	0	0
										Kiss1	0	0	0
										Ren1	0	0	0
										Etnk2	0	0	0
										Sox13	0	0	0
										Ppp1r12b	0	0	0
										9530009M10Rik	0	0	0
										Ptprv	0	0	0
										Ptpn7	0	0	0
										Arl8a	0	0	0
										Gpr37l1	0	0	1
										Elf3	0	0	0
										Rnpep	0	0	1
										Timm17a	0	0	0
										Lmod1	0	0	0
										Shisa4	0	0	0
										Ipo9	0	0	0
										Nav1	0	0	0
										Tmem9	0	0	0
										Cacna1s	0	0	1
										BC115961	0	0	0
										Kif21b	0	0	0
										AK009188	0	0	0
										5730559C18Rik	0	0	0
										Hmcn1	0	0	0
										AK143102	0	0	0
										Nmnat2	0	0	0
										Lamc2	0	0	0
										Lamc2	0	0	0
										Lhx4	0	0	0
										Qsox1	0	0	0
										Pld5	0	0	0
										Fam164b	0	0	0
										Ltv1	0	0	0
										Phactr2	0	0	0
										Enpp3	0	0	0
										Med23	0	0	0
										Arg1	0	0	0
										Ddo	0	0	0
										9030224M15Rik	0	0	0
										Msl3l2	0	0	0
										AK006272	0	0	0
										AK019573	0	0	0
										AK029407	0	0	0
										Ank3	0	0	0
										Slc16a9	0	0	1
										Fam13c	0	0	0
										Bicc1	0	0	0
										AK050217	0	0	0
										Tfam	0	0	0
										Dip2a	0	0	0
										AK154406	0	0	0
										Pcnt	0	0	0
										2610028H24Rik	0	0	0
										Ybey	0	0	0
										Mcm3ap	0	0	0
										AK143813	0	0	0
										Slc19a1	0	0	1
										Col18a1	1	1	0
										Mir135a-2	0	0	0
										Rmst	0	0	0
										BC065048	0	0	0
										4930485B16Rik	0	0	0
										AK039960	0	0	0
										Trhde	0	0	0
										Lgr5	0	0	1
										AK020834	0	0	0
										Tspan8	0	0	0
										Lyz2	0	0	0
										Lyz1	0	0	0
										Cpsf6	0	0	0
										Rab1	0	0	0
										Cep68	0	0	0
										Slc1a4	0	0	0
										Cpeb4	0	0	0
										mKIAA1673	0	0	0
										Il9r	0	0	1
										Snrnp25	0	0	0
										Rhbdf1	0	0	0
										Mpg	0	0	0
										Nprl3	0	0	0
										Hba-x	0	0	0
										Hba-a2	0	0	0
										Hbq1b	0	0	0
										Hba-a2	0	0	0
										Hbq1a	0	0	0
										Sh3pxd2b	0	0	0
										Odz2	0	0	0
										Gria1	0	0	1
										Ngfr	0	0	1
										Phb	0	0	0
										AK027957	0	0	0
										Zfp652	0	0	0
										AB341654	0	0	0
										Igf2bp1	0	0	1
										Gip	0	0	0
										Snf8	0	0	0
										Ube2z	0	0	0
										Atp5g1	0	0	0
										Erbb2	0	0	1
										1810046J19Rik	0	0	0
										Grb7	0	0	0
										Ikzf3	0	0	0
										Zpbp2	0	0	0
										Ormdl3	0	0	0
										AK135963	0	0	0
										1110057K04Rik	0	0	0
										Gdf7	0	0	0
										AK206780	0	0	0
										Wdr35	0	0	0
										Ttc32	0	0	0
										Fam49a	0	0	0
										Ddx1	0	0	0
										Rnf144a	0	0	0
										Rsad2	0	0	0
										Cmpk2	0	0	0
										Nampt	0	0	0
										AK016682	0	0	0
										Sypl	0	0	0
										Cdhr3	1	1	1
										F730043M19Rik	0	0	0
										Ahr	0	0	0
										AK086288	0	0	0
										AK018624	0	0	0
										AK006560	0	0	0
										Rtn1	0	0	0
										Vrk1	0	0	0
										4933406K04Rik	0	0	0
										Ppp2r5c	0	0	0
										Dync1h1	0	0	0
										1700001K19Rik	0	0	0
										Hsp90aa1	0	0	0
										Gpr132	0	0	1
										Jag2	0	0	0
										Nudt14	0	0	0
										Brf1	0	0	0
										Btbd6	0	0	0
										Pacs2	0	0	0
										AK006031	0	0	0
										Klf6	0	0	0
										Zp4-ps	0	0	0
										Ryr2	0	0	0
										Lrrc16a	0	0	0
										E2f3	0	0	0
										Phactr1	0	0	0
										Tbc1d7	0	0	0
										Gfod1	0	0	0
										Rnf144b	0	0	0
										Sfxn1	0	0	0
										Hrh2	0	0	0
										AK015900	0	0	0
										Unc5a	0	0	1
										Hk3	0	0	0
										Uimc1	0	0	0
										Trpc7	0	0	0
										Hnrnpa0	0	0	0
										AK039557	0	0	0
										5133401N09Rik	0	0	0
										Ubqln1	0	0	0
										2210016F16Rik	0	0	0
										Hnrnpk	0	0	0
										Rmi1	0	0	0
										Slc28a3	0	0	0
										Zcchc6	0	0	0
										Vcan	0	0	0
										AK040967	0	0	0
										Xrcc4	0	0	0
										Gm15450	0	0	0
										Atg10	0	0	0
										AK016283	0	0	0
										Bhmt	0	0	0
										Bhmt2	0	0	0
										Dmgdh	0	0	0
										AK046172	0	0	0
										4930452B06Rik	0	0	0
										AK015458	0	0	0
										Fhit	0	0	1
										Adk	0	0	0
										Myst4	0	0	0
										Dupd1	0	0	0
										Dusp13	0	0	0
										Dusp13	0	0	0
										Mmrn2	0	0	0
										Bmpr1a	0	0	1
										9230112D13Rik	0	0	0
										Ldb3	0	0	0
										Grid1	0	0	1
										Nrg3	0	0	1
										Olfr745	0	0	0
										Olfr747	0	0	0
										Olfr748	0	0	0
										Ttc5	0	0	0
										Rpph1	0	0	0
										Parp2	0	0	0
										DQ556351	0	0	0
										Tep1	0	0	0
										Dock5	0	0	0
										Mycbp2	0	0	0
										Ednrb	0	0	1
										AK015289	0	0	0
										Oxct1	0	0	0
										Lrrk2	0	0	1
										Muc19	0	0	0
										BC119421	0	0	0
										Nell2	0	0	0
										Dbx2	0	0	0
										Sema5b	0	0	0
										Dirc2	0	0	0
										Hspbap1	0	0	0
										Parp14	0	0	1
										Dtx3l	0	0	0
										Parp9	0	0	0
										Igsf11	1	1	1
										Gbe1	0	0	0
										AK139678	0	0	0
										Hspa13	0	0	0
										Samsn1	0	0	0
										AK087725	0	0	0
										Cxadr	1	1	1
										Tiam1	0	0	1
										AK007854	0	0	0
										Setd4	0	0	0
										Cbr1	0	0	1
										Fndc1	0	0	1
										AK051008	0	0	0
										Tagap	0	0	0
										AK085062	0	0	0
										Rsph3a	0	0	0
										Fgfr1op	0	0	0
										Ccr6	0	0	1
										Brp44l	0	0	0
										AK014435	0	0	0
										AK015714	0	0	0
										Sft2d1	0	0	0
										T	0	0	0
										Pde10a	0	0	0
										Pabpc6	0	0	0
										AK019626	0	0	0
										AK020722	0	0	0
										Qk	0	0	1
										Pacrg	0	0	0
										AK137341	0	0	0
										Park2	0	0	1
										Vmn1r231	0	0	0
										Vmn1r232	0	0	0
										Ppp2r1a	0	0	0
										Vmn1r233	0	0	0
										Zfp160	0	0	0
										Zfp51	0	0	0
										Zfp53	0	0	0
										Zfp52	0	0	0
										Zfp948	0	0	0
										3110052M02Rik	0	0	0
										Prss27	0	0	0
										Kctd5	0	0	0
										Amdhd2	0	0	0
										Hn1l	0	0	0
										Cramp1l	0	0	0
										Ift140	0	0	0
										Tmem204	0	0	1
										Telo2	0	0	0
										Ptx4	0	0	0
										Clcn7	0	0	0
										Zfand3	0	0	0
										Btbd9	1	1	0
										AK169509	0	0	0
										Dnahc8	0	0	0
										Glp1r	0	0	1
										AK138161	0	0	0
										Umodl1	0	0	1
										Abcg1	0	0	1
										Tff3	0	0	0
										Tff2	0	0	0
										AK085535	0	0	0
										Tff1	0	0	0
										Tmprss3	0	0	0
										Ubash3a	0	0	0
										Olfr115	0	0	0
										Olfr116	0	0	0
										Olfr117	0	0	0
										Olfr118	0	0	0
										Olfr119	0	0	0
										Olfr120	0	0	0
										Olfr121	0	0	0
										Olfr124	0	0	0
										Olfr125	0	0	0
										Olfr126	0	0	0
										Olfr127	0	0	0
										Olfr128	0	0	0
										Olfr761	0	0	0
										Olfr129	0	0	0
										Opn5	0	0	0
										Gpr115	0	0	1
										Gpr111	0	0	1
										Cd2ap	1	1	1
										Tnfsf14	0	0	1
										C3	0	0	0
										Gpr108	0	0	0
										Trip10	0	0	1
										Vav1	0	0	0
										Srsf7	0	0	0
										Ttc39d	0	0	0
										Gemin6	0	0	0
										Dhx57	0	0	0
										Morn2	0	0	0
										Wac	0	0	0
										6030446N20Rik	0	0	0
										Riok3	0	0	0
										3110002H16Rik	0	0	0
										Cdh2	1	1	1
										Cxxc5	0	0	0
										AK021191	0	0	0
										Psd2	0	0	0
										4930471G03Rik	0	0	0
										Pcdhac2	0	0	0
										AK042845	0	0	0
										Pcdhb1	1	1	1
										Pcdhb2	1	1	1
										Pcdhb3	1	1	1
										Pcdhb4	1	1	1
										Pcdhb5	1	1	1
										Pcdhb6	1	1	1
										Pcdhb7	1	1	1
										Pcdhb8	1	1	1
										Pcdhb9	1	1	1
										Pcdhb10	1	1	1
										Pcdhb11	1	1	1
										Pcdhb12	1	1	1
										Pcdhb13	1	1	1
										Pcdhb14	1	1	1
										Pcdhb15	1	1	1
										Pcdhb16	1	1	1
										Pcdhb17	1	1	1
										Pcdhb18	1	1	1
										Pcdhb19	1	1	1
										Pcdhb20	1	1	1
										Pcdhb21	1	1	1
										Slc25a2	0	0	0
										Taf7	0	0	0
										AK150172	0	0	0
										AK149307	0	0	0
										Snx24	0	0	0
										Ppic	0	0	0
										AK044363	0	0	0
										Cep120	0	0	0
										Csnk1g3	0	0	0
										Chsy3	0	0	0
										Dcc	0	0	0
										AK046168	0	0	0
										Suv420h1	0	0	0
										Chka	0	0	0
										Tcirg1	0	0	1
										Ndufs8	0	0	0
										Aldh3b1	0	0	0
										Unc93b1	0	0	0
										Aldh3b1	0	0	0
										Aldh3b2	0	0	0
										Acy3	0	0	1
										Tbx10	0	0	0
										Nudt8	0	0	0
										Doc2g	0	0	0
										Ndufv1	0	0	0
										Gstp1	0	0	0
										Gstp2	0	0	1
										BC021614	0	0	0
										Olfr1440	0	0	0
										Olfr1441	0	0	0
										Pfpl	0	0	0
										Mpeg1	0	0	0
										Dtx4	0	0	0
										Psat1	0	0	0
										Plce1	0	0	1
										Noc3l	0	0	0
										Tbc1d12	0	0	0
										Hells	0	0	0
										Cyp2c55	0	0	0
										Cyp2c65	0	0	0
										Add3	0	0	1
										1700001K23Rik	0	0	0
										Nanos1	0	0	0
										Eif3a	0	0	0
										AK087340	0	0	0
										Fam45a	0	0	0
										Sfxn4	0	0	0
										Prdx3	0	0	0
										Grk5	0	0	1
										Frmd4a	0	0	0
										AK027935	0	0	0
										Prpf18	0	0	0
										Bend7	0	0	0
										Camk1d	0	0	0
										Pip4k2a	0	0	0
										Armc3	0	0	0
										Pnpla7	0	0	0
										Nelf	0	0	1
										Entpd8	0	0	1
										Noxa1	0	0	1
										AK085201	0	0	0
										Nrarp	0	0	0
										Sec16a	0	0	1
										AK075572	0	0	0
										Notch1	0	0	1
										Egfl7	0	0	0
										Agpat2	0	0	0
										Adamts13	0	0	0
										5930434B04Rik	0	0	0
										Slc2a6	0	0	0
										Tmem8c	0	0	0
										Adamtsl2	0	0	0
										Dbh	0	0	0
										Sardh	0	0	0
										Vav2	0	0	1
										Wdr38	0	0	0
										Rpl35	0	0	0
										Arpc5l	0	0	0
										Golga1	0	0	0
										Scai	0	0	0
										AK041976	0	0	0
										AK019604	0	0	0
										Integrin Alpha-4	0	0	0
										Itga4	1	1	0
										Cerkl	0	0	0
										Ppp1r1c	0	0	0
										Pde1a	0	0	0
										Ambra1	0	0	0
										Mdk	0	0	0
										Dgkz	0	0	1
										Creb3l1	0	0	0
										AK039132	0	0	0
										Olfr1300-ps1	0	0	0
										Olfr1301	0	0	0
										Olfr1302	0	0	0
										Olfr1303	0	0	0
										Olfr1305	0	0	0
										AK019710	0	0	0
										Ccdc32	0	0	0
										Rpusd2	0	0	0
										Casc5	0	0	0
										Rad51	0	0	0
										Fam82a2	0	0	0
										Gchfr	0	0	0
										Dnajc17	0	0	0
										Gm14137	0	0	0
										Zfyve19	0	0	0
										Ppp1r14d	0	0	0
										Rhov	0	0	1
										Vps18	0	0	0
										Gm14207	0	0	0
										Chac1	0	0	0
										Ino80	0	0	0
										1500003O03Rik	0	0	0
										1700020I14Rik	0	0	0
										Oip5	0	0	0
										Nusap1	0	0	0
										Ndufaf1	0	0	0
										Rtf1	0	0	0
										Itpka	0	0	0
										Ltk	0	0	1
										Rpap1	0	0	0
										Tyro3	1	1	1
										Mga	0	0	0
										Mapkbp1	0	0	0
										Jmjd7	0	0	0
										Ehd4	0	0	1
										Slc24a3	0	0	1
										Tgm2	0	0	1
										1700060C20Rik	0	0	0
										D630003M21Rik	0	0	0
										Bpi	0	0	0
										Lbp	0	0	0
										Snhg11	0	0	0
										Gm826	0	0	0
										Mafb	0	0	0
										Ptpn1	0	0	0
										Fam65c	0	0	0
										AK027991	0	0	0
										Pard6b	0	0	1
										AK018699	0	0	0
										Atp9a	0	0	0
										Spata16	0	0	0
										Mynn	0	0	0
										Lrrc34	0	0	0
										Lrriq4	0	0	0
										Lrrc31	0	0	0
										Sec62	0	0	0
										Gpr160	0	0	1
										Cldn11	1	1	1
										Slc7a14	0	0	0
										Kcnmb2	0	0	0
										Dnajc19	0	0	0
										Fxr1	0	0	0
										4932438A13Rik	0	0	0
										AK029633	0	0	0
										Adad1	0	0	0
										Il2	0	0	0
										Gm5148	0	0	0
										Nbea	0	0	1
										Mab21l1	0	0	0
										Golim4	0	0	0
										Fstl5	0	0	0
										Col11a1	1	1	0
										Rab2a	0	0	0
										Chd7	0	0	0
										AK002417	0	0	0
										Slc26a7	0	0	1
										Necab1	0	0	0
										Tmem64	0	0	0
										Olfr157	0	0	0
										Olfr155	0	0	0
										Glipr2	0	0	0
										Ccin	0	0	0
										Clta	0	0	0
										Gne	0	0	0
										Rnf38	0	0	0
										AK012547	0	0	0
										Smc2	0	0	0
										Astn2	0	0	0
										Elavl2	0	0	0
										BC042782	0	0	0
										AK089375	0	0	0
										AK157456	0	0	0
										Fggy	0	0	0
										Nfia	0	0	0
										Usp24	0	0	0
										Pcsk9	0	0	0
										Bsnd	0	0	1
										AK028711	0	0	0
										Dhcr24	0	0	0
										Osbpl9	0	0	0
										Calr4	0	0	0
										Eps15	0	0	1
										Cyp4a29-ps	0	0	0
										Cyp4a12a	0	0	0
										4732418C07Rik	0	0	0
										4930544O15Rik	0	0	0
										Atpaf1	0	0	0
										Mobkl2c	0	0	0
										Mknk1	0	0	0
										Kncn	0	0	0
										Dmbx1	0	0	0
										DQ704763	0	0	0
										DQ566885	0	0	0
										DQ702572	0	0	0
										DQ695238	0	0	0
										DQ725081	0	0	0
										DQ704082	0	0	0
										DQ721121	0	0	0
										DQ707409	0	0	0
										DQ697509	0	0	0
										DQ560624	0	0	0
										DQ697183	0	0	0
										Mycbp	0	0	0
										Rragc	0	0	0
										AK132134	0	0	0
										AK160260	0	0	0
										Pou3f1	0	0	0
										Utp11l	0	0	0
										Fhl3	0	0	0
										Sf3a3	0	0	0
										Gja4	0	0	1
										Gjb3	0	0	1
										Gjb4	0	0	1
										Gjb5	0	0	1
										AK019643	0	0	0
										Mecr	0	0	0
										Srsf4	0	0	0
										AK047558	0	0	0
										Epb4.1	0	0	1
										Oprd1	0	0	1
										DQ687290	0	0	0
										DQ713846	0	0	0
										Ythdf2	0	0	0
										C1qb	0	0	0
										C1qc	0	0	0
										C1qa	0	0	0
										Epha8	0	0	0
										Zbtb40	0	0	0
										AK033051	0	0	0
										Errfi1	0	0	1
										Park7	0	0	0
										Tnfrsf9	0	0	0
										Uts2	0	0	0
										Per3	0	0	0
										Vamp3	1	1	1
										Camta1	0	0	0
										9330182L06Rik	0	0	0
										Grm3	0	0	1
										Cd36	1	1	1
										Gnat3	0	0	0
										Psmc2	0	0	0
										Slc26a5	0	0	1
										Reln	1	1	0
										Lhfpl3	0	0	0
										Paxip1	0	0	0
										Htr5a	0	0	1
										Bre	0	0	0
										Cpz	0	0	0
										2310079F23Rik	0	0	0
										AK016496	0	0	0
										Acox3	0	0	0
										Htra3	0	0	0
										Sh3tc1	0	0	0
										Ablim2	0	0	0
										Rab28	0	0	1
										Nkx3-2	0	0	0
										Bod1l	0	0	0
										Sod3	0	0	0
										Sel1l3	0	0	0
										1810013D10Rik	0	0	0
										AK006413	0	0	0
										AK021093	0	0	0
										Wdfy3	0	0	0
										AK076789	0	0	0
										Barhl2	0	0	0
										AK138287	0	0	0
										Zfp644	0	0	0
										Dr1	0	0	0
										Pigg	0	0	0
										AK031816	0	0	0
										Pde6b	0	0	0
										Atp5k	0	0	0
										Mfsd7a	0	0	0
										Pcgf3	0	0	0
										Sez6l	0	0	1
										Myo18b	0	0	0
										Foxn4	0	0	0
										Ube3b	0	0	0
										Rpl29	1	1	0
										Cit	0	0	1
										Prkab1	0	0	0
										Rph3a	0	0	0
										Ptpn11	0	0	0
										Rpl6	0	0	0
										Gm15800	0	0	0
										Gm15800	0	0	0
										BC019639	0	0	0
										Gm15800	0	0	0
										Trafd1	0	0	0
										Naa25	0	0	0
										Erp29	0	0	0
										5930412G12Rik	0	0	0
										Fzd10	0	0	0
										Piwil1	0	0	0
										Rimbp2	0	0	1
										Eif2ak1	0	0	0
										Ankrd61	0	0	0
										Aimp2	0	0	0
										Pms2	0	0	0
										Rsph10b2	0	0	0
										Ccz1	0	0	0
										Ocm	0	0	0
										C1galt1	0	0	0
										AK006052	0	0	0
										Foxp2	0	0	0
										Mdfic	0	0	0
										St7	0	0	0
										Wnt2	0	0	0
										Asz1	0	0	0
										Gcc1	0	0	1
										Arf5	0	0	1
										Fscn3	0	0	0
										Pax4	0	0	0
										Snd1	0	0	0
										Lrrc4	0	0	1
										Exoc4	0	0	0
										Gm5567	0	0	0
										Agk	0	0	0
										Olfr461	0	0	0
										Olfr460	0	0	0
										Clec5a	0	0	1
										Tas2r138	0	0	0
										Mgam	0	0	0
										Moxd2	0	0	0
										AF479018	0	0	0
										BC048599	0	0	0
										1700074P13Rik	0	0	0
										1810009J06Rik	0	0	0
										Cntnap2	1	1	0
										Grid2	0	0	1
										Mad2l1	0	0	0
										Vmn1r32	0	0	0
										Vmn1r33	0	0	0
										DQ545191	0	0	0
										Figla	0	0	0
										Aldh1l1	0	0	0
										BC100523	0	0	0
										Slc41a3	0	0	1
										AK083777	0	0	0
										Suclg2	0	0	0
										Fam19a1	0	0	0
										1700123L14Rik	0	0	0
										Lhfpl4	0	0	0
										Mtmr14	0	0	0
										Cpne9	0	0	0
										Brpf1	0	0	1
										AK016007	0	0	0
										Ogg1	0	0	0
										Camk1	0	0	0
										Tada3	0	0	0
										Arpc4	0	0	0
										Ttll3	0	0	0
										Rpusd3	0	0	0
										Cidec	0	0	0
										Jagn1	0	0	0
										Il17re	0	0	0
										Il17rc	0	0	0
										Creld1	0	0	0
										Prrt3	0	0	0
										Irak2	0	0	0
										Tatdn2	0	0	0
										Ghrl	0	0	0
										Sec13	0	0	0
										Atp2b2	0	0	1
										Cd69	0	0	0
										4922502D21Rik	0	0	0
										Clec12a	0	0	1
										Clec12b	0	0	1
										Clec1b	0	0	0
										Lrp6	1	1	1
										Mansc1	0	0	0
										LOC100502936	0	0	0
										Psmc4	0	0	0
										Fcgbp	0	0	0
										9530053A07Rik	0	0	0
										Fbl	0	0	0
										Dyrk1b	0	0	0
										Gmfg	0	0	0
										Lrfn1	0	0	1
										Il28a	0	0	0
										Il28b	0	0	0
										Sycn	0	0	0
										Nccrp1	0	0	0
										Pak4	0	0	0
										C330005M16Rik	0	0	0
										Fbxo17	0	0	0
										Mrps12	0	0	0
										Sars2	0	0	0
										Sirt2	0	0	0
										AK040398	0	0	0
										Rinl	0	0	0
										Luzp2	0	0	0
										Cpeb1	0	0	1
										Ap3b2	0	0	0
										BC048679	0	0	0
										AK013794	0	0	0
										Fsd2	0	0	0
										Homer2	0	0	1
										AK199694	0	0	0
										Fah	0	0	0
										Zfand6	0	0	0
										AK011897	0	0	0
										Olfr291	0	0	0
										Olfr290	0	0	0
										Ccdc83	0	0	0
										Rab30	0	0	1
										4632434I11Rik	0	0	0
										Prcp	0	0	0
										Gm9934	0	0	0
										Fam181b	0	0	0
										AK077481	0	0	0
										4930451I11Rik	0	0	0
										Doc2a	0	0	0
										Ino80e	0	0	0
										Taok2	0	0	0
										Tmem219	0	0	0
										Kctd13	0	0	0
										Asphd1	0	0	0
										Sez6l2	0	0	1
										BC099577	0	0	0
										Cdipt	0	0	1
										Cd2bp2	0	0	0
										Tbc1d10b	0	0	0
										Mylpf	0	0	0
										2012-09-01	0	0	0
										Zfp553	0	0	0
										Zfp771	0	0	0
										Dctpp1	0	0	0
										Sephs2	0	0	0
										Itgal	1	1	0
										Zfp768	0	0	0
										Zfp747	0	0	0
										9130019O22Rik	0	0	0
										Zfp764	0	0	0
										Fam155a	0	0	0
										Csmd1	0	0	0
										Myst3	0	0	0
										Ank1	0	0	1
										1810011O10Rik	0	0	0
										Ido2	0	0	0
										Ido1	0	0	0
										Adam18	0	0	0
										Adam3	0	0	0
										Odz3	0	0	0
										Tll1	0	0	0
										Use1	0	0	0
										Ocel1	0	0	0
										Nr2f6	0	0	0
										Ushbp1	0	0	0
										5430437P03Rik	0	0	0
										Ankle1	0	0	0
										Abhd8	0	0	0
										Mrpl34	0	0	0
										Dda1	0	0	0
										Ano8	0	0	0
										Gtpbp3	0	0	0
										Plvap	0	0	1
										AK141396	0	0	0
										Siah1a	0	0	0
										N4bp1	0	0	0
										AK139810	0	0	0
										4933402J07Rik	0	0	0
										AK007095	0	0	0
										Zfp423	0	0	0
										Cntnap4	1	1	0
										Plcg2	0	0	0
										Sdr42e1	0	0	0
										Hsd17b2	0	0	0
										Mphosph6	0	0	0
										4933403G14Rik	0	0	0
										Ntpcr	0	0	0
										Pcnxl2	0	0	0
										AK043846	0	0	0
										BC021891	0	0	0
										Pard3	1	1	0
										Mmp20	0	0	0
										Mmp7	0	0	0
										Tmem123	0	0	0
										Sesn3	0	0	0
										BC003348	0	0	0
										Endod1	0	0	0
										Kdm4d	0	0	0
										Cwc15	0	0	0
										Amotl1	0	0	0
										AK027968	0	0	0
										Piwil4	0	0	0
										Fat3	1	1	1
										Opcml	0	0	0
										AK039836	0	0	0
										AK084170	0	0	0
										Mir125b-1	0	0	0
										2900052N01Rik	0	0	0
										Cadm1	1	1	1
										Nnmt	0	0	0
										Zbtb16	0	0	1
										4833427G06Rik	0	0	0
										Btg4	0	0	0
										Pou2af1	0	0	0
										1810046K07Rik	0	0	0
										Chst2	0	0	0
										2610101N10Rik	0	0	0
										Pcolce2	0	0	0
										Trpc1	0	0	0
										Pls1	0	0	0
										1700065D16Rik	0	0	0
										Cep70	0	0	0
										AK015183	0	0	0
										Esyt3	0	0	1
										Mras	0	0	1
										1600029I14Rik	0	0	0
										Armc8	0	0	0
										Dbr1	0	0	0
										A4gnt	0	0	0
										Dzip1l	0	0	0
										Cldn18	0	0	1
										AK076865	0	0	0
										Gm7455	0	0	0
										Arih2	0	0	0
										Slc25a20	0	0	0
										Prkar2a	0	0	1
										Ip6k2	0	0	0
										Ip6k2	0	0	0
										Nckipsd	0	0	0
										Dhx30	0	0	0
										Smarcc1	0	0	0
										Cspg5	0	0	1
										2610002I17Rik	0	0	0
										Scap	0	0	0
										Adamtsl1	0	0	0
										Gm2663	0	0	0
										Chrna7	0	0	1
										Bai3	0	0	1
										AB349959	0	0	0
										4921511C04Rik	0	0	0
										4930594C11Rik	0	0	0
										DQ693259	0	0	0
										Fzd7	1	1	1
										Pik3c2b	0	0	0
										Igfn1	0	0	0
										Tmem9	0	0	0
										Acbd6	0	0	0
										AK007067	0	0	0
										AK158188	0	0	0
										B130006D01Rik	0	0	0
										Tubb2a-ps2	0	0	0
										Nrxn3	0	0	0
										B930059L03Rik	0	0	0
										Drd1a	0	0	1
										Klhl3	0	0	0
										Mir874	0	0	0
										Mir7-1	0	0	0
										Atp6ap1l	0	0	0
										Gm3833	0	0	0
										Mir346	0	0	0
										Olfr749	0	0	0
										Ccnb1ip1	0	0	0
										Btg3	0	0	0
										Mir802	0	0	0
										Prr18	0	0	0
										T2	0	0	0
										Pdpk1	0	0	1
										Ccdc154	0	0	0
										Gm6402	0	0	0
										3110082D06Rik	0	0	0
										Arhgef33	0	0	0
										Ube2d2	0	0	0
										Nrg2	0	0	1
										Pcdhb22	1	1	1
										AK043330	0	0	0
										Cabp2	0	0	1
										Snora19	0	0	0
										Mir126	0	0	0
										Fam69b	0	0	0
										Snora17	0	0	0
										Pla2g4b	0	0	0
										9430008C03Rik	0	0	0
										Samd7	0	0	0
										AK051383	0	0	0
										4933417G07Rik	0	0	0
										Pdlim5	0	0	1
										Reck	0	0	1
										Tmem200b	0	0	0
										Magi2	0	0	1
										Adamts3	0	0	0
										Gm6588	0	0	0
										AK006593	0	0	0
										Myo1h	0	0	0
										Kctd10	0	0	0
										Tmem233	0	0	0
										Vmn1r34	0	0	0
										Iqsec1	0	0	0
										Loh12cr1	0	0	0
										Gm8994	0	0	0
										1700028B04Rik	0	0	0
										Fbxo27	0	0	0
										Gm6537	0	0	0
										Mir1839	0	0	0
										Whamm	0	0	0
										Vmn2r65	0	0	0
										Fam57b	0	0	0
										Hirip3	0	0	0
										Gm4532	0	0	0
										E430018J23Rik	0	0	0
										Mir684-1	0	0	0
										Zfp688	0	0	0
										Gm4975	0	0	0
										Gm10638	0	0	0
										4930567H12Rik	0	0	0
										Arhgap42	0	0	0
										Mir100	0	0	0
										Mirlet7a-2	0	0	0
										Mir34c	0	0	0
										Mir34b	0	0	0
										Gm684	0	0	0
										Atr	0	0	0
										Txndc6	0	0	0
										Sox14	0	0	0
										Col6a4	1	1	0
										GO:0007155	cell adhesion
										GO:0022610	biological adhesion
										GO:0005886	plasma membrane

## Sheet: Ger dDAF
# species: Mus musculus										GO:0005344	GO:0015671	GO:0015669
# support: EXP, IMP, ISS, ISM, TAS, IEA, IDA, IGI, ISO, IGC, NAS, IPI, IEP, ISA, RCA, IC									Vmn1r195	0	0	0
# associations retrieved on: 2012-01-12 15:41:22-05									Slc7a1	0	0	0
# gofunc built on: 2011-09-27 00:14:12.081902-04									Spag16	0	0	0
# gene associations file: ftp://ftp.geneontology.org/pub/go/gene-associations/gene_association.mgi.gz									Vwc2l	0	0	0
# revision: 1.888									Cdh19	0	0	0
# downloaded on: 2011-09-26 20:52:45-04									Srgap2	0	0	0
# GO DAG files from: http://archive.geneontology.org/latest-full/go_201109-assocdb-tables.tar.gz									Sft2d2	0	0	0
# downloaded on: 2011-09-14 13:37:39-04									Tiprl	0	0	0
# translation required: yes									Gpr161	0	0	0
# translation info:									Dcaf6	0	0	0
# authority: ensembl									Phactr2	0	0	0
# synergizer db built on: 2011-09-13 18:29:21.292355-04									Pcdh15	0	0	0
# synergizer db built from: Ensembl Genes 63 / Ensembl Metazoa Genes 10 / Ensembl Plants Genes 10									Slc16a7	0	0	0
# namespace: mgi_symbol									AK076845	0	0	0
# coverage: 99.9%									Il9r	0	0	0
# size of "genespace": 25067									Snrnp25	0	0	0
# number of attributes: 14615									Rhbdf1	0	0	0
# NOTE: the last record consists of all the entities in the									Mpg	0	0	0
# "genespace" that are not associated with any attribute (for									Nprl3	0	0	0
# the requested support).									Hba-x	1	1	1
# Original number of entities in query: 71									Hba-a2	0	0	0
# Number of entities in query: 70									Hbq1b	1	1	1
# Total number of entities: 25076									Hba-a2	0	0	0
# Original total number of entities: 25067									Hbq1a	1	1	1
# Entities not in default gene space: 9									Sh3pxd2b	0	0	0
# Total number of attributes: 14615									4930534B04Rik	0	0	0
# Translation required: yes									Vmn1r193	0	0	0
# Translation coverage: 0.998909									Vmn1r194	0	0	0
# Mode: unordered									Vmn1r197	0	0	0
# Number of simulations: 1000									Mmrn2	0	0	0
# Adjusted P-value cutoff: 0.05									Bmpr1a	0	0	0
# Over/under: over									9230112D13Rik	0	0	0
# Evidence codes: EXP, IMP, ISS, ISM, TAS, IEA, IDA, IGI, ISO, IGC, NAS, IPI, IEP, ISA, RCA, IC									Ldb3	0	0	0
OVERREPRESENTED ATTRIBUTES									Tgds	0	0	0
N	X	LOD	P	P_adj	attrib ID	attrib name			Gpr180	0	0	0
3	10	2.23763	2.46497e-06	0.006	GO:0005344	oxygen transporter activity			AK017006	0	0	0
3	10	2.23763	2.46497e-06	0.006	GO:0015671	oxygen transport			Sox21	0	0	0
3	16	1.98226	1.13652e-05	0.027	GO:0015669	gas transport			AK039417	0	0	0
									Zhx2	0	0	0
									Nell2	0	0	0
									Park2	0	0	0
									Cdh22	0	0	0
									Slc35c2	0	0	0
									Elmo2	0	0	0
									Zfp663	0	0	0
									Amy2b	0	0	0
									Amy2a5	0	0	0
									Gm5105	0	0	0
									Mttp	0	0	0
									Rg9mtd2	0	0	0
									AK030206	0	0	0
									2810405K02Rik	0	0	0
									Tnfrsf14	0	0	0
									Htt	0	0	0
									A930005I04Rik	0	0	0
									Mtus2	0	0	0
									Tbc1d9	0	0	0
									Ucp1	0	0	0
									Elmod2	0	0	0
									4933434I20Rik	0	0	0
									Clgn	0	0	0
									Nup133	0	0	0
									AK013187	0	0	0
									Abcb10	0	0	0
									Taf5l	0	0	0
									Urb2	0	0	0
									Vmn1r196	0	0	0
									4930579F01Rik	0	0	0
									Ttc34	0	0	0
									Mmel1	0	0	0
									Mir1967	0	0	0
									GO:0005344	oxygen transporter activity
									GO:0015671	oxygen transport
									GO:0015669	gas transport

## Sheet: Fra XPCLR
# species: Mus musculus
# support: EXP, IMP, ISS, ISM, TAS, IEA, IDA, IGI, ISO, IGC, NAS, IPI, IEP, ISA, RCA, IC
# associations retrieved on: 2012-01-03 15:32:30-05
# gofunc built on: 2011-09-27 00:14:12.081902-04
# gene associations file: ftp://ftp.geneontology.org/pub/go/gene-associations/gene_association.mgi.gz
# revision: 1.888											GO:0004181
# downloaded on: 2011-09-26 20:52:45-04										Agbl1	1
# GO DAG files from: http://archive.geneontology.org/latest-full/go_201109-assocdb-tables.tar.gz										Smyd3	0
# downloaded on: 2011-09-14 13:37:39-04										Arih1	0
# translation required: yes										Alk	0
# translation info:										Otub2	0
# authority: ensembl										AK015969	0
# synergizer db built on: 2011-09-13 18:29:21.292355-04										Man1a2	0
# synergizer db built from: Ensembl Genes 63 / Ensembl Metazoa Genes 10 / Ensembl Plants Genes 10										Prex2	0
# namespace: mgi_symbol										Pinc	0
# coverage: 99.9%										AK079660	0
# size of "genespace": 25067										Marco	0
# number of attributes: 14615										Ccdc93	0
# NOTE: the last record consists of all the entities in the										Ddx18	0
# "genespace" that are not associated with any attribute (for										AK158929	0
# the requested support).										Fam5c	0
# Original number of entities in query: 333										BC026585	0
# Number of entities in query: 331										Sec16b	0
# Total number of entities: 25120										Rabgap1l	0
# Original total number of entities: 25067										Rc3h1	0
# Entities not in default gene space: 53										Serpinc1	0
# Total number of attributes: 14615										Zbtb37	0
# Translation required: yes										Gas5	0
# Translation coverage: 0.998909										Dars2	0
# Mode: unordered										Atf6	0
# Number of simulations: 1000										Kif26b	0
# Adjusted P-value cutoff: 0.05										BC023483	0
# Over/under: over										Lefty1	0
# Evidence codes: EXP, IMP, ISS, ISM, TAS, IEA, IDA, IGI, ISO, IGC, NAS, IPI, IEP, ISA, RCA, IC										Tmem63a	0
OVERREPRESENTED ATTRIBUTES										Ephx1	0
N	X	LOD	P	P_adj	attrib ID	attrib name				Dusp10	0
5	21	1.40298	6.59409e-06	0.014	GO:0004181	metallocarboxypeptidase activity				Eprs	0
										9630028B13Rik	0
										AK138296	0
										Slc30a10	0
										Ush2a	0
										1500009L16Rik	0
										AK082148	0
										Polr3b	0
										Ric8b	0
										Mgat4c	0
										Nts	0
										Rassf9	0
										Alx1	0
										Dyrk2	0
										Adcy1	0
										Igfbp1	0
										Igfbp3	0
										Cobl	0
										AK040873	0
										Gm2a	0
										Slc36a3	0
										AK040665	0
										Slc36a2	0
										Crhr1	0
										Apoh	0
										Ccdc46	0
										E030025P04Rik	0
										Kcnh5	0
										Rhoj	0
										Rgs6	0
										Asb2	0
										Ddx24	0
										Ifi27l1	0
										Ifi27l2a	0
										Ifi27l2b	0
										Psmg4	0
										Slc22a23	0
										Atp12a	0
										Rnf17	0
										Htr2a	0
										Esd	0
										Lrch1	0
										4930564B18Rik	0
										Tpt1	0
										Tpt1p	0
										Gtf2f2	0
										Kctd4	0
										AK019031	0
										Ubac2	0
										Gpr18	0
										Gpr183	0
										Timm8a2	0
										A330035P11Rik	0
										Tm9sf2	0
										Clybl	0
										1700108J01Rik	0
										Itgbl1	0
										Ctnnd2	0
										Laptm4b	0
										Matn2	0
										Slc25a32	0
										Dcaf13	0
										Rims2	0
										Cpne8	0
										Mcrs1	0
										AK007210	0
										Fam186b	0
										Prpf40b	0
										Fmnl3	0
										Tmbim6	0
										Nckap5l	0
										Bcdin3d	0
										Faim2	0
										Aqp2	0
										Aqp5	0
										Aqp6	0
										Racgap1	0
										Accn2	0
										Smarcd1	0
										Gpd1	0
										2310016M24Rik	0
										Lass5	0
										Lima1	0
										1700030F18Rik	0
										Fam186a	0
										Larp4	0
										Snai2	0
										AI480653	0
										Acap2	0
										Stfa2l1	0
										Gm5483	0
										Gm5416	0
										2010005H15Rik	0
										Lrrc58	0
										Gpr156	0
										BC031361	0
										Gsk3b	0
										AK005838	0
										Cadm2	0
										L3mbtl4	0
										Ypel5	0
										Lbh	0
										Galnt14	0
										Epas1	0
										1700090G07Rik	0
										Atp6v1e2	0
										Rhoq	0
										Pigf	0
										Cript	0
										Nrxn1	0
										Rit2	0
										Prr16	0
										DQ556351	0
										Ostf1	0
										BC016495	0
										2410127L17Rik	0
										1700028P14Rik	0
										C1qtnf4	0
										Ndufs3	0
										Kbtbd4	0
										Ptpmt1	0
										Celf1	0
										BC002221	0
										Rapsn	0
										AK020549	0
										Psmc3	0
										Slc39a13	0
										Sfpi1	0
										Mybpc3	0
										Madd	0
										Ttbk2	0
										Ubr1	0
										Tmem62	0
										Ccndbp1	0
										Epb4.2	0
										Tgm5	0
										Lcmt2	0
										Adal	0
										Tubgcp4	0
										Mtap1a	0
										Ppip5k1	0
										Ckmt1	0
										Strc	0
										Pdia3	0
										Csrp2bp	0
										Vmn2r1	0
										AK035994	0
										Kcnab1	0
										AK039238	0
										AK085325	0
										Ssr3	0
										Ppm1l	0
										AK015105	0
										Fam19a3	0
										Ppm1j	0
										Rhoc	0
										Capza1	0
										St7l	0
										Wnt2b	0
										Papss1	0
										AK135894	0
										Npnt	0
										4930412C18Rik	0
										1700018C11Rik	0
										AK077143	0
										Tnfsf15	0
										Tnfsf8	0
										Tnc	0
										AK020205	0
										AK076794	0
										Bnc2	0
										Cachd1	0
										Lepr	0
										B020004J07Rik	0
										Hes5	0
										Pank4	0
										Plch2	0
										Pex10	0
										Rer1	0
										Morn1	0
										Ski	0
										2610002J02Rik	0
										Prkcz	0
										Gabrd	0
										AK167606	0
										2010015L04Rik	0
										C030017K20Rik	0
										Gnb1	0
										Htt	0
										Arhgap24	0
										Nrf1	0
										Cpa2	1
										Cpa4	1
										Cpa5	1
										Cpa1	1
										Tsga14	0
										Cycs	0
										5430402O13Rik	0
										4921507P07Rik	0
										Npvf	0
										St3gal5	0
										AK039589	0
										Atoh8	0
										Sftpb	0
										Usp39	0
										0610030E20Rik	0
										Tmem150a	0
										Rnf181	0
										Vamp5	0
										Vamp8	0
										Ggcx	0
										Mat2a	0
										Sh2d6	0
										Capg	0
										Elmod3	0
										Retsat	0
										Tgoln2	0
										Tcf7l1	0
										AK131839	0
										AK053994	0
										Lmo3	0
										AK039284	0
										AK169220	0
										AK020962	0
										Igbp1b	0
										AK045483	0
										AK035625	0
										Gabrb3	0
										9430038I01Rik	0
										Glrx3	0
										Enpp6	0
										Gm10649	0
										Inpp4b	0
										Il15	0
										Gpt2	0
										Pdpr	0
										AK020517	0
										AB350566	0
										Glg1	0
										Opcml	0
										Ireb2	0
										Agphd1	0
										AY074887	0
										Psma4	0
										Chrna5	0
										Chrna3	0
										Chrnb4	0
										Ube2q2	0
										Fbxo22	0
										Nrg4	0
										2410076I21Rik	0
										Neo1	0
										Adpgk	0
										Bbs4	0
										AK138089	0
										Tmem202	0
										AK153351	0
										Plekho2	0
										AK180939	0
										Pif1	0
										Slc22a13	0
										9330176C04Rik	0
										Osr1	0
										Oxsr1	0
										Wdr48	0
										Gorasp1	0
										Ttc21a	0
										Csrnp1	0
										Vmn2r2	0
										Vmn2r3	0
										Vmn2r4	0
										Vmn2r5	0
										Vmn2r6	0
										Vmn2r7	0
										A830018L16Rik	0
										Htr5b	0
										Snord47	0
										1700056E22Rik	0
										Anks1b	0
										Lrriq1	0
										AB339931	0
										AB339931	0
										AB340012	0
										AB339931	0
										AB339827	0
										AB339850	0
										AB340065	0
										4933407P14Rik	0
										Snora31	0
										Odf1	0
										Kcnh3	0
										2310068J16Rik	0
										Atp13a3	0
										Tgm7	0
										Zscan29	0
										Trp53bp1	0
										Catsper2	0
										Mov10	0
										Cttnbp2nl	0
										Tbck	0
										Tmem52	0
										BC054353	0
										Ebf3	0
										GO:0004181	metallocarboxypeptidase activity

## Sheet: Fra Rsbl
no results				Tgm3
				9930013L23Rik
				Agbl1
				Klhdc10
				1700021F05Rik
				BC064714
				Ntsr1
				Smyd3
				Dtd1
				Gpld1
				Olfr1274-ps
				Prrxl1
				Tsg101
				Alk
				Zhx2
				Acot13
				Kctd3
				Prex2
				Msc
				AK080352
				Ptp4a1
				Lgsn
				4931428L18Rik
				4930521A18Rik
				Nab1
				Sf3b1
				Coq10b
				Hspd1
				Hspe1
				Plekhm3
				Akr1cl
				Cryge
				Crygd
				Crygc
				Crygb
				Cryga
				D630023F18Rik
				Idh1
				Pinc
				AK079660
				Cxcr2
				Accn4
				Chpf
				Tmem198
				Obsl1
				Inha
				Stk11ip
				Slc4a3
				Scg2
				Wdfy1
				Mrpl44
				Serpine2
				Dock10
				Glrp1
				AK030268
				Arl4c
				Ndufa10
				Aqp12
				Kif1a
				Agxt
				2310007B03Rik
				AK086911
				Sned1
				D1Ertd622e
				Ppip5k2
				Gin1
				Pam
				AK039635
				Phlpp1
				Bcl2
				AK085305
				Serpinb2
				Serpinb8
				AK085943
				AK043174
				Cntnap5a
				AK043935
				Rgs13
				Rgs1
				Tsen15
				Glt25d2
				Rgl1
				Gorab
				Zfp238
				AK082514
				AK156859
				AK009784
				1700016C15Rik
				Adss
				Lefty2
				Pycr2
				Lefty1
				Tmem63a
				Ephx1
				9130409I23Rik
				Nvl
				Cnih4
				Wdr26
				D1Pas1
				Esrrg
				AK084554
				Ush2a
				AK083547
				Prox1
				Lats1
				Katna1
				AK165776
				AK084809
				Ppil4
				Zc3h12d
				Gpr126
				AK029599
				Sgk1
				DQ696813
				DQ699395
				DQ568657
				DQ708007
				Pdss2
				Speer5-ps1
				AK082148
				Syn3
				Timp3
				Ppp1r12a
				Pawr
				Syt1
				AK015773
				AK135691
				Tbc1d30
				BC048403
				Srgap1
				Ppm1h
				Mon2
				Usp15
				R3hdm2
				Stac3
				Ndufa4l2
				Shmt2
				Nxph4
				Lrp1
				Stat6
				Tmem194
				Myo1a
				Ascc2
				Uqcr10
				Zmat5
				Cabp7
				Nf2
				AK217604
				Dbnl
				Pgam2
				Polm
				Aebp1
				Pold2
				Myl7
				Gck
				Grb10
				Cobl
				AK040873
				AK018427
				Meis1
				1110067D22Rik
				AK078949
				Gabrp
				AK051482
				Kcnip1
				Gabra6
				Gabrb2
				Atp10b
				AK087644
				BC079904
				Slu7
				C1qtnf2
				Ccnjl
				Fabp6
				Adra1b
				AK144274
				P4ha2
				Csf2
				Il3
				Acsl6
				4930404A10Rik
				Cdc42se2
				AK087691
				Hint1
				Gpx3
				Tnip1
				Anxa6
				Ccdc69
				Gm2a
				Slc36a3
				Galnt10
				AK007998
				Sap30l
				Hand1
				Zbtb4
				Chrnb1
				Fgf11
				Tmem102
				G630025P09Rik
				4933402P03Rik
				Spem1
				Nlgn2
				1810027O10Rik
				Tnk1
				Kctd11
				Acap1
				2810408A11Rik
				Neurl4
				Gps2
				Ybx2
				Slc2a4
				Cldn7
				Rai12
				Ctdnep1
				A430084P05Rik
				Rabep1
				Ksr1
				Wsb1
				4932411E22Rik
				Ankfn1
				Cntnap1
				Ramp2
				Vps25
				Wnk4
				Ccdc56
				Cntd1
				Becn1
				Psme3
				Aoc2
				Aoc3
				G6pc
				AK144330
				2810433D01Rik
				Ccdc43
				Myl4
				Efcab3
				Mettl2
				2012-03-10
				Helz
				Cacng1
				Cacng4
				Cacng5
				DQ566736
				DQ710056
				DQ714579
				DQ685128
				AB251181
				DQ553243
				DQ545902
				DQ557440
				DQ700852
				DQ543173
				Apoh
				Ccdc46
				E030025P04Rik
				Rgs9
				Sox9
				AK138212
				AK005912
				AK015526
				Rnaseh1
				Adi1
				Ttc15
				Tssc1
				Hdac9
				Nrcam
				Stxbp6
				Nin
				Pygl
				AK154735
				Trim9
				Tmx1
				Kcnh5
				Rhoj
				Gphb5
				Ppp2r5e
				Syne2
				Golga5
				Chga
				Itpk1
				Unc79
				Klc1
				Xrcc3
				Zfyve21
				Ppp1r13b
				5033406O09Rik
				2010107E04Rik
				Aspg
				Mir203
				Kif26a
				Vmn1r-ps103
				Vmn1r201
				Vmn1r202
				Vmn1r203
				Vmn1r204
				Vmn1r205
				BC005537
				Tdp2
				D130043K22Rik
				Aldh5a1
				AK034200
				AK007041
				Rbm24
				Cap2
				Fbp2
				Fbp1
				Trip13
				Brd9
				Zdhhc11
				Tppp
				Cep72
				Slc9a3
				Erap1
				Cast
				Mctp1
				Ankrd32
				Edil3
				Lhfpl2
				Scamp1
				AK050283
				Tmem171
				Pde4d
				AK087292
				AK049621
				Ercc6
				3425401B19Rik
				Wdfy4
				Nrg3
				AK007151
				Rnf17
				Cenpj
				Parp4
				AK045225
				Pspc1
				Atp8a2
				Tnfrsf19
				AK215081
				Sacs
				Sgcg
				1700109G14Rik
				Arl11
				Ebpl
				Kpna3
				AK200207
				Rp1l1
				Prss55
				Prss51
				Prss52
				AK020680
				Msra
				Scara5
				Pbk
				Esco2
				AK007038
				Nkx2-6
				Nkx3-1
				Slc25a37
				Rcbtb2
				Med4
				Nudt15
				Sucla2
				AY139115
				Htr2a
				Esd
				Lrch1
				4930564B18Rik
				Cog3
				Slc25a30
				Tpt1
				Tpt1p
				Gtf2f2
				Kctd4
				Tsc22d1
				1700108F19Rik
				Epsti1
				Tnfsf11
				Akap11
				Lmo7
				D130009I18Rik
				AK015607
				Abcc4
				A330035P11Rik
				Tm9sf2
				Clybl
				1700108J01Rik
				Pcca
				AK157947
				Tmtc4
				AK136126
				Nalcn
				Fgf14
				Ranbp3l
				1110020G09Rik
				Adamts12
				Tars
				Npr3
				BC028532
				Cdh10
				AK084059
				Acot10
				Cdh12
				Trio
				Dnahc5
				Mtdh
				Laptm4b
				Matn2
				9430069I07Rik
				Rpl30
				BC030476
				Hrsp12
				Pop1
				Zfp706
				AK144984
				Klf10
				Rims2
				Tm7sf4
				Dpys
				Lrp12
				AK155489
				Kcnv1
				Eif3h
				Utp23
				Trib1
				AK035211
				AK041614
				AK015428
				Gsdmc
				Fam49b
				Asap1
				Lynx1
				Ly6d
				D730001G18Rik
				Ly6k
				Hemt1
				Cyp11b1
				Cyp11b2
				2010109I03Rik
				Ly6i
				Ly6a
				Ly6c1
				Gramd4
				Cerk
				AK182695
				Fam19a5
				Ttll8
				Mlc1
				Mov10l1
				Panx2
				AK007571
				Trabd
				1300018J18Rik
				Tubgcp6
				Cpne8
				AK005807
				Gxylt1
				Yaf2
				Adamts20
				Prpf40b
				Fmnl3
				Tmbim6
				Nckap5l
				Bcdin3d
				Faim2
				Aqp2
				Aqp5
				Aqp6
				Racgap1
				Accn2
				Smarcd1
				Gpd1
				2310016M24Rik
				Lass5
				Lima1
				Scn8a
				Ankrd33
				Acvrl1
				Acvr1b
				Krt78
				Krt8
				Krt18
				Eif4b
				Tenc1
				Soat2
				Rarg
				Mfsd5
				Espl1
				Pfdn5
				Myg1
				Aaas
				Sp7
				Sp1
				Amhr2
				Prr13
				Pcbp2
				Map3k12
				Tarbp2
				Npff
				Atf7
				AK046786
				Snn
				AK214451
				Txndc11
				Zc3h7a
				Snx29
				AK014704
				Cpped1
				Gm9961
				Rtp4
				AK144120
				BC031361
				Gsk3b
				App
				AK166404
				AK082307
				AK087806
				1600014C23Rik
				AK080425
				Kat2b
				Sgol1
				Fbxl17
				AK160416
				Fert2
				Ptprm
				L3mbtl4
				Ypel5
				Lbh
				Galnt14
				AK085353
				Ehd3
				Xdh
				AK007204
				Foxn2
				Rit2
				Syt4
				Slc25a46
				Sap130
				Sft2d3
				Lims2
				Gpr17
				Myo7b
				Iws1
				Slc27a6
				Isoc1
				Wdr7
				D18Ertd653e
				Setbp1
				Cyb5
				Fbxo15
				1700034H14Rik
				Dok6
				Ostf1
				BC016495
				2410127L17Rik
				D030056L22Rik
				Trpm3
				BC044868
				AK019124
				Klf9
				Kank1
				Dmrt3
				AK086006
				Kcnv2
				AK161402
				D19Bwg1357e
				Lcor
				AK171159
				AK145489
				AI606181
				Slit1
				AK167556
				Arhgap19
				Frat1
				Frat2
				Rrp12
				Tdrd1
				Vwa2
				Afap1l2
				Ablim1
				Atrnl1
				Gpr158
				Ptprj
				Fnbp4
				Mtch2
				C1qtnf4
				Ndufs3
				Kbtbd4
				Ptpmt1
				Celf1
				BC002221
				Rapsn
				AK020549
				Psmc3
				Slc39a13
				Sfpi1
				Mybpc3
				Madd
				AK140370
				Ttc17
				2810002D19Rik
				Api5
				0610012H03Rik
				Rcn1
				AU015228
				1700010M22Rik
				Aspax1
				Pax1
				Blcap
				Nnat
				Peg5
				Ptprt
				9430021M05Rik
				Srsf6
				L3mbtl
				Sgk2
				Ift52
				Rps21
				Cables2
				BC066135
				Gata5
				AK045814
				AK140896
				AK165607
				Slco4a1
				Ift80
				Smc4
				Trim59
				Kpna4
				BC062821
				Ppm1l
				BC048678
				AK086005
				AK158189
				Pet112l
				Fam160a1
				Glt28d2
				SH3d19
				Prss48
				Gja5
				Acp6
				Fmo5
				Prkab2
				AK080051
				Sec22b
				Abca4
				Bcar3
				Fnbp1l
				Pde5a
				AK050844
				AK135894
				Npnt
				Col24a1
				Rps20
				Mos
				Plag1
				DQ072386
				Clvs1
				Asph
				4930412C18Rik
				1700009N14Rik
				1300002K09Rik
				Tdrd7
				Tmod1
				D630039A03Rik
				Musk
				Lpar1
				Zfp618
				D10920
				Ambp
				Kif12
				Col27a1
				Tnfsf8
				Tnc
				AK020205
				AK076794
				Sh3gl2
				Pde4b
				Sgip1
				AK218396
				BC064118
				Tctex1d1
				BB031773
				Insl5
				Mier1
				Slc35d1
				Ebna1bp2
				Olfr62
				Olfr1342
				Olfr1341
				Olfr1340
				Olfr1339
				Olfr1338
				Olfr1337
				Olfr1335
				Olfr1333
				Foxj3
				Guca2a
				Krc
				Hivep3
				A330049M08Rik
				Rcan3
				Nipal3
				4930555I21Rik
				Grhl3
				Prdm16
				5930403L14Rik
				AK083203
				Actrt2
				AK030206
				2810405K02Rik
				Tnfrsf14
				Hes5
				Pank4
				Plch2
				Pex10
				Rer1
				Morn1
				Ski
				2610002J02Rik
				Prkcz
				Gabrd
				AK167606
				2010015L04Rik
				C030017K20Rik
				Gnb1
				Ppp2r2c
				Wfs1
				BC120798
				Grxcr1
				Srd5a3
				Tmem165
				Clock
				Exoc1
				Cep135
				Anapc5
				DQ544617
				Rnf34
				Kdm2b
				AK079939
				Orai1
				Morn3
				Tmem120b
				Wbscr17
				Auts2
				AK138849
				6330406I15Rik
				4930588N13Rik
				Wdr95
				Fry
				Tfpi2
				Gngt1
				Gng11
				Bet1
				AK039608
				AK037260
				Glcci1
				Gm2058
				AK007083
				Zc3hc1
				Svs1
				2410003K15Rik
				Igf2bp3
				Aqp1
				Ghrhr
				Adcyap1r1
				Sftpb
				Usp39
				0610030E20Rik
				Tmem150a
				Rnf181
				Vamp5
				Vamp8
				Ggcx
				Mat2a
				Sh2d6
				Capg
				Elmod3
				Retsat
				Tgoln2
				Tcf7l1
				AK131839
				AK053994
				Kcmf1
				AK006896
				4931417E11Rik
				Ctnna2
				Mgll
				Abtb1
				Podxl2
				Mcm2
				Tpra1
				Nup210
				Hdac11
				Fbln2
				4930590J08Rik
				Fgd5
				Nr2c2
				Fam19a1
				Pdzrn3
				Chl1
				Cntn6
				Cacna1c
				Parp11
				Efcab4b
				Dera
				Plcz1
				Capza3
				Pthlh
				Ccdc91
				AK076842
				Far2
				Saa3
				Saa4
				Saa1
				Saa2
				Hps5
				Gtf2h1
				Ldha
				Ldhc
				Uevld
				AK045483
				AK035625
				Nav2
				Dbx1
				Htatip2
				Prmt3
				Slc6a5
				Nell1
				Atp10a
				A330076H08Rik
				AK086712
				Klhl25
				Tmc3
				AK042300
				Stard5
				Il16
				Mesdc1
				Mesdc2
				Fam108c
				Galntl4
				Tead1
				Rassf10
				BC042407
				AK016028
				Arntl
				Spon1
				Rras2
				Xylt1
				Rps15a
				Arl6ip1
				Smg1
				4930583K01Rik
				Syt17
				Itpripl2
				Coq7
				Tmc7
				Prkcb
				Cacng3
				Rbbp6
				AK140221
				Tnrc6a
				AK016032
				Th
				Gm10649
				Nr3c2
				Zfp827
				1700011L22Rik
				Otud4
				Abce1
				Cdh8
				AK139634
				Cdh5
				Sf3b3
				Cog4
				Fuk
				St3gal2
				Ddx19a
				Ddx19b
				Aars
				Exosc6
				Pdpr
				AK020517
				Znrf1
				Ldhd
				Zfp1
				Zfp1
				Ctrb1
				Bcar1
				Cfdp1
				Dynlrb2
				Cdyl2
				AK029672
				AK133333
				Osgin1
				Necab2
				Slc38a8
				Mbtps1
				Hsdl1
				Lrrc50
				Ankrd11
				Ankrd11
				Spg7
				AK020930
				Nrp1
				AK050336
				Olfr160
				Olfr151
				Olfr874
				Olfr875
				Olfr876
				Olfr877
				Olfr145
				Olfr878
				Grik4
				Fxyd6
				Fxyd2
				AK014786
				Dscaml1
				Cyp19a1
				DQ552759
				DQ695285
				DQ690752
				DQ695082
				DQ550004
				DQ694625
				DQ697422
				DQ723589
				DQ727320
				DQ544250
				DQ562020
				DQ559606
				DQ543221
				DQ693458
				DQ714600
				DQ726916
				DQ554737
				DQ565074
				DQ721815
				DQ702589
				DQ694944
				DQ720431
				DQ707920
				DQ689945
				DQ544692
				DQ698807
				DQ724541
				DQ709984
				DQ702163
				DQ545475
				DQ720100
				DQ702854
				DQ709019
				DQ703299
				DQ707078
				DQ720754
				DQ723226
				DQ709607
				DQ695859
				DQ556518
				DQ709965
				DQ717970
				DQ563495
				DQ547388
				DQ700448
				DQ696926
				DQ701975
				DQ695049
				DQ725679
				DQ725213
				DQ707315
				DQ557000
				DQ691824
				DQ541263
				DQ568963
				DQ543350
				DQ704048
				DQ697620
				DQ719413
				DQ556020
				DQ724729
				DQ716029
				DQ690904
				DQ725182
				DQ540543
				DQ709549
				DQ716920
				DQ684769
				DQ719139
				DQ705021
				DQ707024
				DQ547239
				DQ690706
				DQ714356
				DQ546580
				DQ540943
				DQ541658
				DQ727343
				DQ688496
				DQ547562
				DQ564575
				DQ703407
				DQ719525
				DQ726874
				DQ718403
				DQ707708
				DQ719581
				DQ548336
				DQ696267
				DQ703591
				DQ545935
				DQ727011
				DQ561922
				DQ561579
				DQ726631
				DQ703701
				DQ693128
				DQ687248
				DQ686550
				DQ540096
				DQ700691
				DQ560613
				DQ686472
				DQ686008
				DQ713459
				AK007116
				Gldn
				Tbc1d21
				AK006934
				AK015493
				6030419C18Rik
				Cd276
				Nptn
				2410076I21Rik
				Uaca
				AK018968
				AK167957
				Rab11a
				Dennd4a
				Slc24a1
				2010321M09Rik
				Ptplad1
				Rora
				9530091C08Rik
				Lrrc1
				Plscr1
				Plscr2
				1700057G04Rik
				Plscr4
				B430319G15Rik
				Plod2
				Spsb4
				AK085341
				Slc25a36
				Ephb1
				AK049838
				AK135764
				Pdcd6ip
				Clasp2
				Ubp1
				Itga9
				Scn10a
				Scn11a
				AK076661
				Wdr48
				Ttc21a
				Csrnp1
				Xirp1
				Cx3cr1
				Ccr8
				Slc25a38
				Rpsa
				Snora62
				Mobp
				A830018L16Rik
				Gm4850
				Tns1
				Rufy4
				Ap1s3
				Rnf152
				Serpinb10-ps
				BC013529
				4930444G20Rik
				Bend3
				Anks1b
				Gm6924
				D930020B18Rik
				Mirlet7i
				Nab2
				BC029853
				Mir146
				Pttg1
				Lyrm7
				Plscr3
				Tmem95
				Eif5a
				Ezh1
				Gpatch8
				Fzd2
				Gm1564
				Itgb3
				Prkca
				Abhd12b
				Sipa1l1
				Tdrd9
				BC048943
				Mir3073
				AK006712
				Hnrnpa1
				BC065997
				Tmem174
				Mphosph8
				Gm9199
				Cysltr2
				Spert
				Snora31
				Serp2
				Mir2145-2
				A2ld1
				Cdh9
				Ncald
				Odf1
				Utp23
				4933412E24Rik
				Gml
				Ly6e
				Pdzrn4
				Spryd3
				Igfbp6
				AK149278
				4932415M13Rik
				Cep192
				Mir1192
				Dmrt1
				C030016D13Rik
				Agbl2
				Mir129-2
				Nkx2-2as
				Mir3091
				Mir1-1
				Mir133a-2
				Mir15b
				Mir16-2
				Pde4dip
				Tbck
				Chchd7
				E230008N13Rik
				Akap2
				Wdr78
				Wdr65
				Guca2b
				Srrm1
				Ttc34
				Mmel1
				Tmem52
				Gm7271
				Wdr95
				Gig18
				Gpnmb
				BC054353
				Strap
				1700049E15Rik
				Mir344f
				Tcerg1l
				Snord111
				Clec18a
				Megf11
				Plscr5

## Sheet: Fra dDAF
# species: Mus musculus										GO:0000226
# support: EXP, IMP, ISS, ISM, TAS, IEA, IDA, IGI, ISO, IGC, NAS, IPI, IEP, ISA, RCA, IC									AK043922	0
# associations retrieved on: 2012-01-12 15:14:14-05									Ptpn2	0
# gofunc built on: 2011-09-27 00:14:12.081902-04									AK078979	0
# gene associations file: ftp://ftp.geneontology.org/pub/go/gene-associations/gene_association.mgi.gz									Seh1l	1
# revision: 1.888									AK016077	0
# downloaded on: 2011-09-26 20:52:45-04									Anxa5	0
# GO DAG files from: http://archive.geneontology.org/latest-full/go_201109-assocdb-tables.tar.gz									AK043581	0
# downloaded on: 2011-09-14 13:37:39-04									Exosc9	0
# translation required: yes									Suds3	0
# translation info:									Disc1	1
# authority: ensembl									AK076865	0
# synergizer db built on: 2011-09-13 18:29:21.292355-04									Cep192	1
# synergizer db built from: Ensembl Genes 63 / Ensembl Metazoa Genes 10 / Ensembl Plants Genes 10									Ccna2	0
# namespace: mgi_symbol
# coverage: 99.9%
# size of "genespace": 25067									GO:0000226	microtubule cytoskeleton organization
# number of attributes: 14615
# NOTE: the last record consists of all the entities in the
# "genespace" that are not associated with any attribute (for
# the requested support).
# Original number of entities in query: 13
# Number of entities in query: 13
# Total number of entities: 25072
# Original total number of entities: 25067
# Entities not in default gene space: 5
# Total number of attributes: 14615
# Translation required: yes
# Translation coverage: 0.998909
# Mode: unordered
# Number of simulations: 1000
# Adjusted P-value cutoff: 0.05
# Over/under: over
# Evidence codes: EXP, IMP, ISS, ISM, TAS, IEA, IDA, IGI, ISO, IGC, NAS, IPI, IEP, ISA, RCA, IC
OVERREPRESENTED ATTRIBUTES
N	X	LOD	P	P_adj	attrib ID	attrib name
3	155	1.73594	6.33322e-05	0.046	GO:0000226	microtubule cytoskeleton organization

## Sheet: Cze XPCLR
no results				Nfkbib
				4930547N16Rik
				AK015376
				Sf3b1
				Coq10b
				Aspm
				F13b
				Cfhr1
				AK015277
				Rgs2
				ENSMUSG00000058934
				Igf1
				Tyms-ps
				Pmch
				Nup37
				Ccdc53
				AK016100
				Rph3al
				1700016K19Rik
				Fam101b
				Vps53
				Fam57a
				AK198984
				Gemin4
				Dbil5
				Glod4
				Rnmtl1
				Nxn
				Timm22
				Abr
				Car10
				AK135963
				Kcnf1
				Pdia6
				Atp6v1c2
				Mirg
				AK014028
				Dio3os
				Dio3
				Ppp2r5c
				1700108F19Rik
				9030625A04Rik
				Ccdc122
				Enox1
				Pcdh17
				9630013A20Rik
				Diap3
				Azin1
				Bai1
				Prrc1

## Sheet: Cze Rsbl
# species: Mus musculus															GO:0042613	GO:0042611	GO:0002504	GO:0019882	GO:0007155	GO:0022610	GO:0004984	GO:0007608	GO:0007606	GO:0007600
# support: EXP, IMP, ISS, ISM, TAS, IEA, IDA, IGI, ISO, IGC, NAS, IPI, IEP, ISA, RCA, IC														Acpl2	0	0	0	0	0	0	0	0	0	0
# associations retrieved on: 2012-01-12 15:28:25-05														Arfrp1	0	0	0	0	0	0	0	0	0	0
# gofunc built on: 2011-09-27 00:14:12.081902-04														Egfl8	0	0	0	0	0	0	0	0	0	0
# gene associations file: ftp://ftp.geneontology.org/pub/go/gene-associations/gene_association.mgi.gz														Kcnd3	0	0	0	0	0	0	0	0	0	0
# revision: 1.888														Olfr958	0	0	0	0	0	0	1	1	1	1
# downloaded on: 2011-09-26 20:52:45-04														Pigy	0	0	0	0	0	0	0	0	0	0
# GO DAG files from: http://archive.geneontology.org/latest-full/go_201109-assocdb-tables.tar.gz														Vps13b	0	0	0	0	0	0	0	0	0	0
# downloaded on: 2011-09-14 13:37:39-04														Epha6	0	0	0	0	0	0	0	0	0	0
# translation required: yes														Tcerg1l	0	0	0	0	0	0	0	0	0	0
# translation info:														Slc35a5	0	0	0	0	0	0	0	0	0	0
# authority: ensembl														Ntsr1	0	0	0	0	0	0	0	0	0	0
# synergizer db built on: 2011-09-13 18:29:21.292355-04														Olfr916	0	0	0	0	0	0	1	1	1	1
# synergizer db built from: Ensembl Genes 63 / Ensembl Metazoa Genes 10 / Ensembl Plants Genes 10														Olfr746	0	0	0	0	0	0	1	1	1	1
# namespace: mgi_symbol														Hormad1	0	0	0	0	0	0	0	0	0	0
# coverage: 99.9%														Pigt	0	0	0	0	0	0	0	0	0	0
# size of "genespace": 25067														Nrf1	0	0	0	0	0	0	0	0	0	0
# number of attributes: 14615														Pkd2l1	0	0	0	0	0	0	0	0	0	0
# NOTE: the last record consists of all the entities in the														Mtfmt	0	0	0	0	0	0	0	0	0	0
# "genespace" that are not associated with any attribute (for														Hs1bp3	0	0	0	0	0	0	0	0	0	0
# the requested support).														Il17f	0	0	0	0	0	0	0	0	0	0
# Original number of entities in query: 1736														Olfr974	0	0	0	0	0	0	1	1	1	1
# Number of entities in query: 1707														Olfr631	0	0	0	0	0	0	1	1	1	1
# Total number of entities: 25387														St6gal2	0	0	0	0	0	0	0	0	0	0
# Original total number of entities: 25067														Tmem87b	0	0	0	0	0	0	0	0	0	0
# Entities not in default gene space: 320														1110021J02Rik	0	0	0	0	0	0	0	0	0	0
# Total number of attributes: 14615														Mysm1	0	0	0	0	0	0	0	0	0	0
# Translation required: yes														Samd3	0	0	0	0	0	0	0	0	0	0
# Translation coverage: 0.998909														Tstd2	0	0	0	0	0	0	0	0	0	0
# Mode: unordered														Cass4	0	0	0	0	1	1	0	0	0	0
# Number of simulations: 1000														Agpat1	0	0	0	0	0	0	0	0	0	0
# Adjusted P-value cutoff: 0.05														Pbx2	0	0	0	0	0	0	0	0	0	0
# Over/under: over														Dennd3	0	0	0	0	0	0	0	0	0	0
# Evidence codes: EXP, IMP, ISS, ISM, TAS, IEA, IDA, IGI, ISO, IGC, NAS, IPI, IEP, ISA, RCA, IC														Rb1cc1	0	0	0	0	0	0	0	0	0	0
OVERREPRESENTED ATTRIBUTES														Prex2	0	0	0	0	0	0	0	0	0	0
N	X	LOD	P	P_adj	attrib ID	attrib name								Il17a	0	0	0	0	0	0	0	0	0	0
8	9	1.89738	3.48273e-09	<0.001	GO:0042613	MHC class II protein complex								AK205147	0	0	0	0	0	0	0	0	0	0
10	20	1.1444	1.82106e-07	0.001	GO:0042611	MHC protein complex								Mcm3	0	0	0	0	0	0	0	0	0	0
8	18	1.05212	9.76755e-06	0.02	GO:0002504	antigen processing and presentation of peptide or polysaccharide antigen via MHC class II								Paqr8	0	0	0	0	0	0	0	0	0	0
15	49	0.797751	4.33867e-07	0.002	GO:0019882	antigen processing and presentation								Efhc1	0	0	0	0	0	0	0	0	0	0
74	574	0.324756	5.44329e-08	<0.001	GO:0007155	cell adhesion								Tram2	0	0	0	0	0	0	0	0	0	0
74	580	0.319468	8.3231e-08	<0.001	GO:0022610	biological adhesion								Gm597	0	0	0	0	0	0	0	0	0	0
136	1088	0.316524	1.254e-12	<0.001	GO:0004984	olfactory receptor activity								Lgsn	0	0	0	0	0	0	0	0	0	0
137	1106	0.311963	2.0137e-12	<0.001	GO:0007608	sensory perception of smell								4931428L18Rik	0	0	0	0	0	0	0	0	0	0
140	1194	0.28404	6.09818e-11	<0.001	GO:0007606	sensory perception of chemical stimulus								4930521A18Rik	0	0	0	0	0	0	0	0	0	0
153	1434	0.237037	6.57349e-09	<0.001	GO:0007600	sensory perception								Khdrbs2	0	0	0	0	0	0	0	0	0	0
166	1626	0.215723	3.15597e-08	<0.001	GO:0050877	neurological system process								Bend6	0	0	0	0	0	0	0	0	0	0
177	1821	0.191474	3.15219e-07	0.001	GO:0003008	system process								Dst	0	0	0	0	1	1	0	0	0	0
188	1982	0.179844	6.92779e-07	0.003	GO:0004888	transmembrane signaling receptor activity								Cox5b	0	0	0	0	0	0	0	0	0	0
193	2062	0.173372	1.19043e-06	0.004	GO:0038023	signaling receptor activity								Actr1b	0	0	0	0	0	0	0	0	0	0
212	2301	0.166813	1.0322e-06	0.004	GO:0004871	signal transducer activity								AK016893	0	0	0	0	0	0	0	0	0	0
212	2301	0.166813	1.0322e-06	0.004	GO:0060089	molecular transducer activity								Mgat4a	0	0	0	0	0	0	0	0	0	0
176	1921	0.160855	1.29376e-05	0.023	GO:0007186	G-protein coupled receptor protein signaling pathway								2010300C02Rik	0	0	0	0	0	0	0	0	0	0
467	5601	0.133949	5.51276e-08	<0.001	GO:0031224	intrinsic to membrane								Tsga10	0	0	0	0	0	0	0	0	0	0
457	5476	0.133593	7.38463e-08	<0.001	GO:0016021	integral to membrane								Chst10	0	0	0	0	0	0	0	0	0	0
507	6252	0.12046	4.39069e-07	0.002	GO:0044425	membrane part								Nms	0	0	0	0	0	0	0	0	0	0
														Pdcl3	0	0	0	0	0	0	0	0	0	0
														2610017I09Rik	0	0	0	0	0	0	0	0	0	0
														Pou3f3	0	0	0	0	0	0	0	0	0	0
														2900092D14Rik	0	0	0	0	0	0	0	0	0	0
														AK011913	0	0	0	0	0	0	0	0	0	0
														Myo1b	0	0	0	0	0	0	0	0	0	0
														Stat4	0	0	0	0	0	0	0	0	0	0
														Stat1	0	0	0	0	0	0	0	0	0	0
														Gls	0	0	0	0	0	0	0	0	0	0
														Hibch	0	0	0	0	0	0	0	0	0	0
														1700019D03Rik	0	0	0	0	0	0	0	0	0	0
														AK038423	0	0	0	0	0	0	0	0	0	0
														Stk17b	0	0	0	0	0	0	0	0	0	0
														Hecw2	0	0	0	0	0	0	0	0	0	0
														BC055402	0	0	0	0	0	0	0	0	0	0
														DQ705824	0	0	0	0	0	0	0	0	0	0
														AK016177	0	0	0	0	0	0	0	0	0	0
														Farsb	0	0	0	0	0	0	0	0	0	0
														Mogat1	0	0	0	0	0	0	0	0	0	0
														Slco6d1	0	0	0	0	0	0	0	0	0	0
														AK144617	0	0	0	0	0	0	0	0	0	0
														Cntnap5b	0	0	0	0	1	1	0	0	0	0
														Cdh7	0	0	0	0	1	1	0	0	0	0
														Cdh19	0	0	0	0	1	1	0	0	0	0
														Marco	0	0	0	0	0	0	0	0	0	0
														En1	0	0	0	0	0	0	0	0	0	0
														Ccdc93	0	0	0	0	0	0	0	0	0	0
														Ddx18	0	0	0	0	0	0	0	0	0	0
														Csrp1	0	0	0	0	0	0	0	0	0	0
														AK188772	0	0	0	0	0	0	0	0	0	0
														Phlda3	0	0	0	0	0	0	0	0	0	0
														AK081809	0	0	0	0	0	0	0	0	0	0
														Lad1	0	0	0	0	0	0	0	0	0	0
														Tnnt2	0	0	0	0	0	0	0	0	0	0
														Pkp1	0	0	0	0	1	1	0	0	0	0
														Prg4	0	0	0	0	0	0	0	0	0	0
														Hmcn1	0	0	0	0	0	0	0	0	0	0
														Ivns1abp	0	0	0	0	0	0	0	0	0	0
														1200016B10Rik	0	0	0	0	0	0	0	0	0	0
														Lamc1	0	0	0	0	1	1	0	0	0	0
														E330020D12Rik	0	0	0	0	0	0	0	0	0	0
														Rgs8	0	0	0	0	0	0	0	0	0	0
														Rgs16	0	0	0	0	0	0	0	0	0	0
														Rnasel	0	0	0	0	0	0	0	0	0	0
														Rgsl1	0	0	0	0	0	0	0	0	0	0
														Cacna1e	0	0	0	0	0	0	0	0	0	1
														Fam5b	0	0	0	0	0	0	0	0	0	0
														Astn1	0	0	0	0	1	1	0	0	0	0
														Tnfsf4	0	0	0	0	0	0	0	0	0	0
														Rgs7	0	0	0	0	0	0	0	0	0	0
														AK136128	0	0	0	0	0	0	0	0	0	0
														Fh1	0	0	0	0	0	0	0	0	0	0
														Kmo	0	0	0	0	0	0	0	0	0	0
														Opn3	0	0	0	0	0	0	0	0	0	1
														Chml	0	0	0	0	0	0	0	0	0	0
														Kif26b	0	0	0	0	0	0	0	0	0	0
														BC023483	0	0	0	0	0	0	0	0	0	0
														Cdc42bpa	0	0	0	0	0	0	0	0	0	0
														Mark1	0	0	0	0	0	0	0	0	0	0
														Cnksr3	0	0	0	0	0	0	0	0	0	0
														Oprm1	0	0	0	0	0	0	0	0	0	0
														Stx7	0	0	0	0	0	0	0	0	0	0
														Moxd1	0	0	0	0	0	0	0	0	0	0
														Tmem200a	0	0	0	0	0	0	0	0	0	0
														L3mbtl3	0	0	0	0	0	0	0	0	0	0
														Ascc3	0	0	0	0	0	0	0	0	0	0
														Pla2g12b	0	0	0	0	0	0	0	0	0	0
														Oit3	0	0	0	0	0	0	0	0	0	0
														Ccdc109a	0	0	0	0	0	0	0	0	0	0
														AK039487	0	0	0	0	0	0	0	0	0	0
														1700027D21Rik	0	0	0	0	0	0	0	0	0	0
														Ftcd	0	0	0	0	0	0	0	0	0	0
														Col6a2	0	0	0	0	1	1	0	0	0	0
														Col6a1	0	0	0	0	1	1	0	0	0	0
														Slc5a8	0	0	0	0	0	0	0	0	0	0
														Ano4	0	0	0	0	0	0	0	0	0	0
														Tmtc2	0	0	0	0	0	0	0	0	0	0
														Krr1	0	0	0	0	0	0	0	0	0	0
														Glipr1	0	0	0	0	0	0	0	0	0	0
														Kcnc2	0	0	0	0	0	0	0	0	0	0
														Trhde	0	0	0	0	0	0	0	0	0	0
														Tph2	0	0	0	0	0	0	0	0	0	0
														Tbc1d15	0	0	0	0	0	0	0	0	0	0
														Ikzf1	0	0	0	0	0	0	0	0	0	0
														Ddc	0	0	0	0	0	0	0	0	0	0
														Etaa1	0	0	0	0	0	0	0	0	0	0
														AK013680	0	0	0	0	0	0	0	0	0	0
														Rab1	0	0	0	0	0	0	0	0	0	0
														Cep68	0	0	0	0	0	0	0	0	0	0
														Slc1a4	0	0	0	0	0	0	0	0	0	0
														Wwc1	0	0	0	0	0	0	0	0	0	0
														Odz2	0	0	0	0	0	0	0	0	0	0
														Adra1b	0	0	0	0	0	0	0	0	0	0
														Cyfip2	0	0	0	0	1	1	0	0	0	0
														Itk	0	0	0	0	0	0	0	0	0	0
														Fam71b	0	0	0	0	0	0	0	0	0	0
														Mapk9	0	0	0	0	0	0	0	0	0	0
														Rnf130	0	0	0	0	0	0	0	0	0	0
														Tbc1d9b	0	0	0	0	0	0	0	0	0	0
														3010026O09Rik	0	0	0	0	0	0	0	0	0	0
														Sqstm1	0	0	0	0	0	0	0	0	0	0
														Mgat4b	0	0	0	0	0	0	0	0	0	0
														Ltc4s	0	0	0	0	0	0	0	0	0	0
														AK157916	0	0	0	0	0	0	0	0	0	0
														Maml1	0	0	0	0	0	0	0	0	0	0
														Canx	0	0	0	0	0	0	0	0	0	0
														Cby3	0	0	0	0	0	0	0	0	0	0
														Hnrnph1	0	0	0	0	0	0	0	0	0	0
														Rufy1	0	0	0	0	0	0	0	0	0	0
														AK017220	0	0	0	0	0	0	0	0	0	0
														BC049762	0	0	0	0	0	0	0	0	0	0
														Clk4	0	0	0	0	0	0	0	0	0	0
														Col23a1	0	0	0	0	0	0	0	0	0	0
														Agxt2l2	0	0	0	0	0	0	0	0	0	0
														Fstl4	0	0	0	0	0	0	0	0	0	0
														Slc22a5	0	0	0	0	0	0	0	0	0	0
														Slc22a21	0	0	0	0	0	0	0	0	0	0
														Slc22a4	0	0	0	0	0	0	0	0	0	0
														Pdlim4	0	0	0	0	0	0	0	0	0	0
														P4ha2	0	0	0	0	0	0	0	0	0	0
														Csf2	0	0	0	0	0	0	0	0	0	0
														Il3	0	0	0	0	0	0	0	0	0	0
														Acsl6	0	0	0	0	0	0	0	0	0	0
														Gria1	0	0	0	0	0	0	0	0	0	0
														Pemt	0	0	0	0	0	0	0	0	0	0
														Rai1	0	0	0	0	0	0	0	0	0	0
														Hs3st3a1	0	0	0	0	0	0	0	0	0	0
														Shisa6	0	0	0	0	0	0	0	0	0	0
														Slc16a11	0	0	0	0	0	0	0	0	0	0
														Slc16a13	0	0	0	0	0	0	0	0	0	0
														Bcl6b	0	0	0	0	0	0	0	0	0	0
														Rnasek	0	0	0	0	0	0	0	0	0	0
														Alox12	0	0	0	0	0	0	0	0	0	0
														DQ696666	0	0	0	0	0	0	0	0	0	0
														Alox12e	0	0	0	0	0	0	0	0	0	0
														Alox15	0	0	0	0	0	0	0	0	0	0
														Wscd1	0	0	0	0	0	0	0	0	0	0
														Vps53	0	0	0	0	0	0	0	0	0	0
														Fam57a	0	0	0	0	0	0	0	0	0	0
														AK198984	0	0	0	0	0	0	0	0	0	0
														Gemin4	0	0	0	0	0	0	0	0	0	0
														Dbil5	0	0	0	0	0	0	0	0	0	0
														Glod4	0	0	0	0	0	0	0	0	0	0
														Rnmtl1	0	0	0	0	0	0	0	0	0	0
														Nxn	0	0	0	0	0	0	0	0	0	0
														Accn1	0	0	0	0	0	0	0	0	0	1
														1700071K01Rik	0	0	0	0	0	0	0	0	0	0
														Rffl	0	0	0	0	0	0	0	0	0	0
														Rad51l3	0	0	0	0	0	0	0	0	0	0
														Fndc8	0	0	0	0	0	0	0	0	0	0
														Nle1	0	0	0	0	0	0	0	0	0	0
														Unc45b	0	0	0	0	0	0	0	0	0	0
														AK005634	0	0	0	0	0	0	0	0	0	0
														Slfn5	0	0	0	0	0	0	0	0	0	0
														Slfn9	0	0	0	0	0	0	0	0	0	0
														Slfn8	0	0	0	0	0	0	0	0	0	0
														Slfn10-ps	0	0	0	0	0	0	0	0	0	0
														Slfn1	0	0	0	0	0	0	0	0	0	0
														Slfn4	0	0	0	0	0	0	0	0	0	0
														Slfn3	0	0	0	0	0	0	0	0	0	0
														Tmem100	0	0	0	0	0	0	0	0	0	0
														Skap1	0	0	0	0	0	0	0	0	0	0
														Krt23	0	0	0	0	0	0	0	0	0	0
														Krt39	0	0	0	0	0	0	0	0	0	0
														Krt40	0	0	0	0	0	0	0	0	0	0
														Krtap3-3	0	0	0	0	0	0	0	0	0	0
														Krtap3-2	0	0	0	0	0	0	0	0	0	0
														Krtap3-1	0	0	0	0	0	0	0	0	0	0
														Krtap1-5	0	0	0	0	0	0	0	0	0	0
														Krtap1-4	0	0	0	0	0	0	0	0	0	0
														Krtap1-3	0	0	0	0	0	0	0	0	0	0
														Krtap9-3	0	0	0	0	0	0	0	0	0	0
														Gm11937	0	0	0	0	0	0	0	0	0	0
														Krtap4-1	0	0	0	0	0	0	0	0	0	0
														Krtap4-2	0	0	0	0	0	0	0	0	0	0
														Krtap4-7	0	0	0	0	0	0	0	0	0	0
														Krtap4-6	0	0	0	0	0	0	0	0	0	0
														Krtap4-8	0	0	0	0	0	0	0	0	0	0
														Krtap4-9	0	0	0	0	0	0	0	0	0	0
														Gm11596	0	0	0	0	0	0	0	0	0	0
														Slc39a11	0	0	0	0	0	0	0	0	0	0
														2900041M22Rik	0	0	0	0	0	0	0	0	0	0
														Tnrc6c	0	0	0	0	0	0	0	0	0	0
														Tmc6	0	0	0	0	0	0	0	0	0	0
														Gdf7	0	0	0	0	0	0	0	0	0	0
														AK206780	0	0	0	0	0	0	0	0	0	0
														Rhob	0	0	0	0	1	1	0	0	0	0
														AK192194	0	0	0	0	0	0	0	0	0	0
														AK050516	0	0	0	0	0	0	0	0	0	0
														Fam49a	0	0	0	0	0	0	0	0	0	0
														Fam84a	0	0	0	0	0	0	0	0	0	0
														Ntsr2	0	0	0	0	0	0	0	0	0	0
														Greb1	0	0	0	0	0	0	0	0	0	0
														E2f6	0	0	0	0	0	0	0	0	0	0
														Sox11	0	0	0	0	0	0	0	0	0	0
														Ttc15	0	0	0	0	0	0	0	0	0	0
														Tssc1	0	0	0	0	0	0	0	0	0	0
														Ahr	0	0	0	0	0	0	0	0	0	0
														AK086288	0	0	0	0	0	0	0	0	0	0
														Akap6	0	0	0	0	0	0	0	0	0	0
														Gphn	0	0	0	0	0	0	0	0	0	0
														Fam71d	0	0	0	0	0	0	0	0	0	0
														Mpp5	0	0	0	0	0	0	0	0	0	0
														4930534B04Rik	0	0	0	0	0	0	0	0	0	0
														Tshr	0	0	0	0	0	0	0	0	0	0
														Gtf2a1	0	0	0	0	0	0	0	0	0	0
														Serpina3g	0	0	0	0	0	0	0	0	0	0
														Serpina3h	0	0	0	0	0	0	0	0	0	0
														Serpina3k	0	0	0	0	0	0	0	0	0	0
														Klc1	0	0	0	0	0	0	0	0	0	0
														Xrcc3	0	0	0	0	0	0	0	0	0	0
														Zfyve21	0	0	0	0	0	0	0	0	0	0
														Ppp1r13b	0	0	0	0	0	0	0	0	0	0
														5033406O09Rik	0	0	0	0	0	0	0	0	0	0
														2010107E04Rik	0	0	0	0	0	0	0	0	0	0
														Igh-A (1g2)	0	0	0	0	0	0	0	0	0	0
														Igh	0	0	0	0	0	0	0	0	0	0
														Ighg1	0	0	0	0	0	0	0	0	0	0
														AI324046	0	0	0	0	0	0	0	0	0	0
														AK006031	0	0	0	0	0	0	0	0	0	0
														Klf6	0	0	0	0	0	0	0	0	0	0
														Pitrm1	0	0	0	0	0	0	0	0	0	0
														Hecw1	0	0	0	0	0	0	0	0	0	0
														Pou6f2	0	0	0	0	0	0	0	0	0	0
														Lrrc16a	0	0	0	0	0	0	0	0	0	0
														AK172386	0	0	0	0	0	0	0	0	0	0
														Serpinb6e	0	0	0	0	0	0	0	0	0	0
														Serpinb6c	0	0	0	0	0	0	0	0	0	0
														Serpinb6a	0	0	0	0	0	0	0	0	0	0
														AK004186	0	0	0	0	0	0	0	0	0	0
														Nqo2	0	0	0	0	0	0	0	0	0	0
														Ripk1	0	0	0	0	0	0	0	0	0	0
														F13a1	0	0	0	0	0	0	0	0	0	0
														Ly86	0	0	0	0	0	0	0	0	0	0
														Slc12a7	0	0	0	0	0	0	0	0	0	0
														Nkd2	0	0	0	0	0	0	0	0	0	0
														Trip13	0	0	0	0	0	0	0	0	0	0
														Brd9	0	0	0	0	0	0	0	0	0	0
														Zdhhc11	0	0	0	0	0	0	0	0	0	0
														Slc9a3	0	0	0	0	0	0	0	0	0	0
														Exoc3	0	0	0	0	0	0	0	0	0	0
														Ahrr	0	0	0	0	0	0	0	0	0	0
														Pdcd6	0	0	0	0	0	0	0	0	0	0
														Sdha	0	0	0	0	0	0	0	0	0	0
														Ccdc127	0	0	0	0	0	0	0	0	0	0
														Lrrc14b	0	0	0	0	0	0	0	0	0	0
														Zfp72	0	0	0	0	0	0	0	0	0	0
														Vcan	0	0	0	0	0	0	0	0	0	0
														AK040967	0	0	0	0	0	0	0	0	0	0
														Arsb	0	0	0	0	0	0	0	0	0	0
														Ap3b1	0	0	0	1	0	0	0	0	0	0
														F2r	0	0	0	0	0	0	0	0	0	0
														Iqgap2	0	0	0	0	0	0	0	0	0	0
														F2rl2	0	0	0	0	0	0	0	0	0	0
														AK146386	0	0	0	0	0	0	0	0	0	0
														Tnpo1	0	0	0	0	0	0	0	0	0	0
														AK136034	0	0	0	0	0	0	0	0	0	0
														AK020854	0	0	0	0	0	0	0	0	0	0
														Slc30a5	0	0	0	0	0	0	0	0	0	0
														AK043460	0	0	0	0	0	0	0	0	0	0
														Mast4	0	0	0	0	0	0	0	0	0	0
														AK138842	0	0	0	0	0	0	0	0	0	0
														AK005677	0	0	0	0	0	0	0	0	0	0
														Zswim6	0	0	0	0	0	0	0	0	0	0
														Gpbp1	0	0	0	0	0	0	0	0	0	0
														Snx18	0	0	0	0	0	0	0	0	0	0
														Hspb3	0	0	0	0	0	0	0	0	0	0
														Fhit	0	0	0	0	0	0	0	0	0	0
														Ptprg	0	0	0	0	0	0	0	0	0	0
														Cadps	0	0	0	0	0	0	0	0	0	0
														Synpr	0	0	0	0	0	0	0	0	0	0
														Cacna2d3	0	0	0	0	0	0	0	0	0	0
														Lrtm1	0	0	0	0	0	0	0	0	0	0
														Olfr744	0	0	0	0	0	0	1	1	1	1
														Olfr745	0	0	0	0	0	0	1	1	1	1
														Olfr747	0	0	0	0	0	0	1	1	1	1
														Olfr748	0	0	0	0	0	0	1	1	1	1
														Ttc5	0	0	0	0	0	0	0	0	0	0
														Pcdh17	0	0	0	0	1	1	0	0	0	0
														Pcdh9	0	0	0	0	0	0	0	0	0	0
														Adamts12	0	0	0	0	0	0	0	0	0	0
														6030458C11Rik	0	0	0	0	0	0	0	0	0	0
														Drosha	0	0	0	0	0	0	0	0	0	0
														AK045038	0	0	0	0	0	0	0	0	0	0
														Cdh6	0	0	0	0	1	1	0	0	0	0
														Ctnnd2	0	0	0	0	1	1	0	0	0	0
														Tas2r119	0	0	0	0	0	0	0	0	1	1
														Sema5a	0	0	0	0	0	0	0	0	0	0
														Rpl30	0	0	0	0	0	0	0	0	0	0
														BC030476	0	0	0	0	0	0	0	0	0	0
														Hrsp12	0	0	0	0	0	0	0	0	0	0
														Pop1	0	0	0	0	0	0	0	0	0	0
														Nipal2	0	0	0	0	0	0	0	0	0	0
														Osr2	0	0	0	0	0	0	0	0	0	0
														BC048602	0	0	0	0	0	0	0	0	0	0
														Grhl2	0	0	0	0	0	0	0	0	0	0
														Angpt1	0	0	0	0	1	1	0	0	0	0
														Csmd3	0	0	0	0	0	0	0	0	0	0
														BC026439	0	0	0	0	0	0	0	0	0	0
														Zhx2	0	0	0	0	0	0	0	0	0	0
														AK041614	0	0	0	0	0	0	0	0	0	0
														Khdrbs3	0	0	0	0	0	0	0	0	0	0
														Trappc9	0	0	0	0	0	0	0	0	0	0
														Peg13	0	0	0	0	0	0	0	0	0	0
														Slc45a4	0	0	0	0	0	0	0	0	0	0
														Apol7e	0	0	0	0	0	0	0	0	0	0
														Apol9b	0	0	0	0	0	0	0	0	0	0
														Apol8	0	0	0	0	0	0	0	0	0	0
														Myh9	0	0	0	0	1	1	0	0	0	0
														Bik	0	0	0	0	0	0	0	0	0	0
														Mcat	0	0	0	0	0	0	0	0	0	0
														Tspo	0	0	0	0	0	0	0	0	0	0
														Ttll12	0	0	0	0	0	0	0	0	0	0
														Scube1	0	0	0	0	0	0	0	0	0	0
														Tbc1d22a	0	0	0	0	0	0	0	0	0	0
														AK020795	0	0	0	0	0	0	0	0	0	0
														AK213404	0	0	0	0	0	0	0	0	0	0
														AK219036	0	0	0	0	0	0	0	0	0	0
														Syt10	0	0	0	0	0	0	0	0	0	0
														Pphln1	0	0	0	0	0	0	0	0	0	0
														Prickle1	0	0	0	0	0	0	0	0	0	0
														Abcc1	0	0	0	0	0	0	0	0	0	0
														Ube2v2	0	0	0	0	0	0	0	0	0	0
														Mcm4	0	0	0	0	0	0	0	0	0	0
														Prkdc	0	0	0	0	0	0	0	0	0	0
														Lamp3	0	0	0	0	0	0	0	0	0	0
														B3gnt5	0	0	0	0	0	0	0	0	0	0
														Liph	0	0	0	0	0	0	0	0	0	0
														Senp2	0	0	0	0	0	0	0	0	0	0
														Igf2bp2	0	0	0	0	0	0	0	0	0	0
														Crygs	0	0	0	0	0	0	0	0	0	0
														Tbccd1	0	0	0	0	0	0	0	0	0	0
														Dnajb11	0	0	0	0	0	0	0	0	0	0
														AK149453	0	0	0	0	0	0	0	0	0	0
														Ahsg	0	0	0	0	0	0	0	0	0	0
														Fetub	0	0	0	0	0	0	0	0	0	0
														Hrg	0	0	0	0	0	0	0	0	0	0
														Kng2	0	0	0	0	0	0	0	0	0	0
														Lpp	0	0	0	0	1	1	0	0	0	0
														AK053957	0	0	0	0	0	0	0	0	0	0
														Sema5b	0	0	0	0	0	0	0	0	0	0
														Dirc2	0	0	0	0	0	0	0	0	0	0
														Hspbap1	0	0	0	0	0	0	0	0	0	0
														Parp14	0	0	0	0	0	0	0	0	0	0
														Dtx3l	0	0	0	0	0	0	0	0	0	0
														Parp9	0	0	0	0	0	0	0	0	0	0
														Igsf11	0	0	0	0	1	1	0	0	0	0
														Ccdc80	0	0	0	0	0	0	0	0	0	0
														Atg3	0	0	0	0	0	0	0	0	0	0
														Zpld1	0	0	0	0	0	0	0	0	0	0
														AK015492	0	0	0	0	0	0	0	0	0	0
														Dcbld2	0	0	0	0	1	1	0	0	0	0
														AK194005	0	0	0	0	0	0	0	0	0	0
														St3gal6	0	0	0	0	0	0	0	0	0	0
														Gm813	0	0	0	0	0	0	0	0	0	0
														E330017A01Rik	0	0	0	0	0	0	0	0	0	0
														Gabrr3	0	0	0	0	0	0	0	0	0	0
														Mina	0	0	0	0	0	0	0	0	0	0
														Crybg3	0	0	0	0	0	0	0	0	0	0
														Arl6	0	0	0	0	0	0	0	0	0	0
														AK016054	0	0	0	0	0	0	0	0	0	0
														AK033170	0	0	0	0	0	0	0	0	0	0
														AK077115	0	0	0	0	0	0	0	0	0	0
														Usp25	0	0	0	0	0	0	0	0	0	0
														Grik1	0	0	0	0	0	0	0	0	0	0
														AK016377	0	0	0	0	0	0	0	0	0	0
														Krtap16-7	0	0	0	0	0	0	0	0	0	0
														Urb1	0	0	0	0	0	0	0	0	0	0
														4931408A02Rik	0	0	0	0	0	0	0	0	0	0
														1110004E09Rik	0	0	0	0	0	0	0	0	0	0
														AK005956	0	0	0	0	0	0	0	0	0	0
														4930404I05Rik	0	0	0	0	0	0	0	0	0	0
														4932438H23Rik	0	0	0	0	0	0	0	0	0	0
														Olig2	0	0	0	0	0	0	0	0	0	0
														Olig1	0	0	0	0	0	0	0	0	0	0
														Ifnar2	0	0	0	0	0	0	0	0	0	0
														Il10rb	0	0	0	0	0	0	0	0	0	0
														Dscam	0	0	0	0	1	1	0	0	0	0
														Mmp25	0	0	0	0	0	0	0	0	0	0
														Ccdc64b	0	0	0	0	0	0	0	0	0	0
														Thoc6	0	0	0	0	0	0	0	0	0	0
														Hcfc1r1	0	0	0	0	0	0	0	0	0	0
														Tnfrsf12a	0	0	0	0	1	1	0	0	0	0
														Cldn6	0	0	0	0	0	0	0	0	0	0
														Cldn9	0	0	0	0	0	0	0	0	0	0
														AK047830	0	0	0	0	0	0	0	0	0	0
														Pkmyt1	0	0	0	0	0	0	0	0	0	0
														Paqr4	0	0	0	0	0	0	0	0	0	0
														Kremen2	0	0	0	0	0	0	0	0	0	0
														9530082P21Rik	0	0	0	0	0	0	0	0	0	0
														AK079285	0	0	0	0	0	0	0	0	0	0
														Flywch1	0	0	0	0	0	0	0	0	0	0
														Flywch2	0	0	0	0	0	0	0	0	0	0
														AK086736	0	0	0	0	0	0	0	0	0	0
														Srrm2	0	0	0	0	0	0	0	0	0	0
														Tceb2	0	0	0	0	0	0	0	0	0	0
														Prss33	0	0	0	0	0	0	0	0	0	0
														Prss41	0	0	0	0	0	0	0	0	0	0
														Prss21	0	0	0	0	0	0	0	0	0	0
														Dcpp1	0	0	0	0	0	0	0	0	0	0
														Dcpp2	0	0	0	0	0	0	0	0	0	0
														Dcpp3	0	0	0	0	0	0	0	0	0	0
														Sbp	0	0	0	0	0	0	0	0	0	0
														Sbpl	0	0	0	0	0	0	0	0	0	0
														Prss30	0	0	0	0	0	0	0	0	0	0
														Prss27	0	0	0	0	0	0	0	0	0	0
														Kctd5	0	0	0	0	0	0	0	0	0	0
														Amdhd2	0	0	0	0	0	0	0	0	0	0
														Atp6v0c	0	0	0	0	0	0	0	0	0	0
														Tbc1d24	0	0	0	0	0	0	0	0	0	0
														Ntn3	0	0	0	0	0	0	0	0	0	0
														AK017296	0	0	0	0	0	0	0	0	0	0
														1600002H07Rik	0	0	0	0	0	0	0	0	0	0
														Ccnf	0	0	0	0	0	0	0	0	0	0
														Abca17	0	0	0	0	0	0	0	0	0	0
														Abca3	0	0	0	0	0	0	0	0	0	0
														D330041H03Rik	0	0	0	0	0	0	0	0	0	0
														Rnps1	0	0	0	0	0	0	0	0	0	0
														Dci	0	0	0	0	0	0	0	0	0	0
														Fam195a	0	0	0	0	0	0	0	0	0	0
														0610011F06Rik	0	0	0	0	0	0	0	0	0	0
														Wfikkn1	0	0	0	0	0	0	0	0	0	0
														Rab40c	0	0	0	0	0	0	0	0	0	0
														Pigq	0	0	0	0	0	0	0	0	0	0
														AK178429	0	0	0	0	0	0	0	0	0	0
														Nhlrc4	0	0	0	0	0	0	0	0	0	0
														Nhlrc4	0	0	0	0	0	0	0	0	0	0
														AK192827	0	0	0	0	0	0	0	0	0	0
														Solh	0	0	0	0	0	0	0	0	0	0
														AK006250	0	0	0	0	0	0	0	0	0	0
														Rab11fip3	0	0	0	0	0	0	0	0	0	0
														Decr2	0	0	0	0	0	0	0	0	0	0
														Pnpla1	0	0	0	0	0	0	0	0	0	0
														4930539E08Rik	0	0	0	0	0	0	0	0	0	0
														Pxt1	0	0	0	0	0	0	0	0	0	0
														Kctd20	0	0	0	0	0	0	0	0	0	0
														Stk38	0	0	0	0	0	0	0	0	0	0
														Srsf3	0	0	0	0	0	0	0	0	0	0
														LOC100499420	0	0	0	0	0	0	0	0	0	0
														Pi16	0	0	0	0	0	0	0	0	0	0
														Mtch1	0	0	0	0	0	0	0	0	0	0
														Pim1	0	0	0	0	0	0	0	0	0	0
														Tbc1d22b	0	0	0	0	0	0	0	0	0	0
														Rnf8	0	0	0	0	0	0	0	0	0	0
														AK156427	0	0	0	0	0	0	0	0	0	0
														Ftsjd2	0	0	0	0	0	0	0	0	0	0
														AK086881	0	0	0	0	0	0	0	0	0	0
														Mdga1	0	0	0	0	0	0	0	0	0	0
														Zfp799	0	0	0	0	0	0	0	0	0	0
														Zfp870	0	0	0	0	0	0	0	0	0	0
														Cyp4f14	0	0	0	0	0	0	0	0	0	0
														Cyp4f13	0	0	0	0	0	0	0	0	0	0
														Cyp4f41-ps	0	0	0	0	0	0	0	0	0	0
														Zfp472	0	0	0	0	0	0	0	0	0	0
														Zfp952	0	0	0	0	0	0	0	0	0	0
														Zfp763	0	0	0	0	0	0	0	0	0	0
														4921501E09Rik	0	0	0	0	0	0	0	0	0	0
														BC051537	0	0	0	0	0	0	0	0	0	0
														AK136114	0	0	0	0	0	0	0	0	0	0
														H2-Oa	1	1	1	1	0	0	0	0	0	0
														Brd2	0	0	0	0	0	0	0	0	0	0
														H2-DMa	1	1	1	1	0	0	0	0	0	0
														H2-DMb2	1	1	1	1	0	0	0	0	0	0
														Psmb9	0	0	0	1	0	0	0	0	0	0
														Tap1	0	0	0	1	0	0	0	0	0	0
														Tap2	0	0	0	1	0	0	0	0	0	0
														H2-Ob	1	1	1	1	0	0	0	0	0	0
														H2-Ab1	1	1	1	1	0	0	0	0	0	0
														H2-Aa	1	1	1	1	0	0	0	0	0	0
														AK171153	0	0	0	0	0	0	0	0	0	0
														AK171153	0	0	0	0	0	0	0	0	0	0
														H2-Eb1	1	1	1	1	0	0	0	0	0	0
														H2-Ea-ps	0	0	0	0	0	0	0	0	0	0
														Btnl2	0	0	0	0	0	0	0	0	0	0
														BC051142	0	0	0	0	0	0	0	0	0	0
														Btnl7	0	0	0	0	0	0	0	0	0	0
														Notch4	0	0	0	0	0	0	0	0	0	0
														Ager	0	0	0	0	0	0	0	0	0	0
														Rnf5	0	0	0	0	0	0	0	0	0	0
														Ppt2	0	0	0	0	0	0	0	0	0	0
														Prrt1	0	0	0	0	0	0	0	0	0	0
														Fkbpl	0	0	0	0	0	0	0	0	0	0
														Atf6b	0	0	0	0	0	0	0	0	0	0
														C4b	0	0	0	0	0	0	0	0	0	0
														Cyp21a1	0	0	0	0	0	0	0	0	0	0
														Stk19	0	0	0	0	0	0	0	0	0	0
														Skiv2l	0	0	0	0	0	0	0	0	0	0
														Rdbp	0	0	0	0	0	0	0	0	0	0
														Cfb	0	0	0	0	0	0	0	0	0	0
														C2	0	0	0	0	0	0	0	0	0	0
														Zbtb12	0	0	0	0	0	0	0	0	0	0
														Ehmt2	0	0	0	0	0	0	0	0	0	0
														Slc44a4	0	0	0	0	0	0	0	0	0	0
														Neu1	0	0	0	0	0	0	0	0	0	0
														1110038B12Rik	0	0	0	0	0	0	0	0	0	0
														AF357376	0	0	0	0	0	0	0	0	0	0
														Hspa1b	0	0	0	0	0	0	0	0	0	0
														Hspa1a	0	0	0	0	0	0	0	0	0	0
														Hspa1l	0	0	0	0	0	0	0	0	0	0
														H2-Q10	0	1	0	1	0	0	0	0	0	0
														Pou5f1	0	0	0	0	0	0	0	0	0	0
														Cchcr1	0	0	0	0	0	0	0	0	0	0
														Psors1c2	0	0	0	0	0	0	0	0	0	0
														Cdsn	0	0	0	0	0	0	0	0	0	0
														2300002M23Rik	0	0	0	0	0	0	0	0	0	0
														Sfta2	0	0	0	0	0	0	0	0	0	0
														Gtf2h4	0	0	0	0	0	0	0	0	0	0
														Ddr1	0	0	0	0	1	1	0	0	0	0
														Gm8909	0	0	0	0	0	0	0	0	0	0
														H2-T3	0	0	0	0	0	0	0	0	0	0
														AK138323	0	0	0	0	0	0	0	0	0	0
														Rpp21	0	0	0	0	0	0	0	0	0	0
														Trim39	0	0	0	0	0	0	0	0	0	0
														H2-M10.2	0	0	0	0	0	0	0	0	0	0
														H2-M10.1	0	0	0	0	0	0	0	0	0	0
														H2-M10.3	0	0	0	0	0	0	0	0	0	0
														H2-M10.4	0	0	0	0	0	0	0	0	0	0
														Olfr125	0	0	0	0	0	0	1	1	1	1
														Olfr126	0	0	0	0	0	0	1	1	1	1
														Olfr127	0	0	0	0	0	0	1	1	1	1
														Olfr128	0	0	0	0	0	0	1	1	1	1
														Olfr761	0	0	0	0	0	0	1	1	1	1
														Supt3h	0	0	0	0	0	0	0	0	0	0
														Runx2	0	0	0	0	0	0	0	0	0	0
														Cdc5l	0	0	0	0	0	0	0	0	0	0
														B230354K17Rik	0	0	0	0	0	0	0	0	0	0
														Spats1	0	0	0	0	0	0	0	0	0	0
														Trerf1	0	0	0	0	0	0	0	0	0	0
														Mdfi	0	0	0	0	0	0	0	0	0	0
														Foxp4	0	0	0	0	0	0	0	0	0	0
														DQ716672	0	0	0	0	0	0	0	0	0	0
														Kif6	0	0	0	0	0	0	0	0	0	0
														Pot1b	0	0	0	0	0	0	0	0	0	0
														Emr4	0	0	0	0	0	0	0	0	0	0
														Tmem232	0	0	0	0	0	0	0	0	0	0
														1110012J17Rik	0	0	0	0	0	0	0	0	0	0
														9130404H23Rik	0	0	0	0	0	0	0	0	0	0
														Ptprm	0	0	0	0	1	1	0	0	0	0
														AK006039	0	0	0	0	0	0	0	0	0	0
														Clip4	0	0	0	0	0	0	0	0	0	0
														Alk	0	0	0	0	0	0	0	0	0	0
														Ttc27	0	0	0	0	0	0	0	0	0	0
														Ltbp1	0	0	0	0	0	0	0	0	0	0
														Heatr5b	0	0	0	0	0	0	0	0	0	0
														Ccdc75	0	0	0	0	0	0	0	0	0	0
														Gm6548	0	0	0	0	0	0	0	0	0	0
														Eif2ak2	0	0	0	0	0	0	0	0	0	0
														1110001A16Rik	0	0	0	0	0	0	0	0	0	0
														Cebpz	0	0	0	0	0	0	0	0	0	0
														2410091C18Rik	0	0	0	0	0	0	0	0	0	0
														Prkd3	0	0	0	0	0	0	0	0	0	0
														Cdc42ep3	0	0	0	0	0	0	0	0	0	0
														Slc8a1	0	0	0	0	0	0	0	0	0	0
														Wac	0	0	0	0	0	0	0	0	0	0
														6030446N20Rik	0	0	0	0	0	0	0	0	0	0
														Riok3	0	0	0	0	0	0	0	0	0	0
														3110002H16Rik	0	0	0	0	0	0	0	0	0	0
														Npc1	0	0	0	0	0	0	0	0	0	0
														Ankrd29	0	0	0	0	0	0	0	0	0	0
														Lama3	0	0	0	0	1	1	0	0	0	0
														Cdh2	0	0	0	0	1	1	0	0	0	0
														Rit2	0	0	0	0	0	0	0	0	0	0
														Pcdhb2	0	0	0	0	1	1	0	0	0	0
														Pcdhb3	0	0	0	0	1	1	0	0	0	0
														Pcdhb4	0	0	0	0	1	1	0	0	0	0
														Pcdhb5	0	0	0	0	1	1	0	0	0	0
														Pcdhb6	0	0	0	0	1	1	0	0	0	0
														Pcdhb7	0	0	0	0	1	1	0	0	0	0
														Pcdhb8	0	0	0	0	1	1	0	0	0	0
														Pcdhb9	0	0	0	0	1	1	0	0	0	0
														Pcdhb10	0	0	0	0	1	1	0	0	0	0
														Pcdhb11	0	0	0	0	1	1	0	0	0	0
														Pcdhb12	0	0	0	0	1	1	0	0	0	0
														Pcdhb13	0	0	0	0	1	1	0	0	0	0
														Pcdhb14	0	0	0	0	1	1	0	0	0	0
														Pcdhb15	0	0	0	0	1	1	0	0	0	0
														Pcdhb16	0	0	0	0	1	1	0	0	0	0
														Pcdhb17	0	0	0	0	1	1	0	0	0	0
														Pcdhb18	0	0	0	0	1	1	0	0	0	0
														Pcdhb19	0	0	0	0	1	1	0	0	0	0
														Pcdhb20	0	0	0	0	1	1	0	0	0	0
														Pcdhb21	0	0	0	0	1	1	0	0	0	0
														AK079798	0	0	0	0	0	0	0	0	0	0
														Ppp2r2b	0	0	0	0	0	0	0	0	0	0
														Hsd17b4	0	0	0	0	0	0	0	0	0	0
														Fam170a	0	0	0	0	0	0	0	0	0	0
														Gramd3	0	0	0	0	0	0	0	0	0	0
														1700011I03Rik	0	0	0	0	0	0	0	0	0	0
														AK036854	0	0	0	0	0	0	0	0	0	0
														Gm4951	0	0	0	0	0	0	0	0	0	0
														Adrb2	0	0	0	0	0	0	0	0	0	0
														Gm9949	0	0	0	0	0	0	0	0	0	0
														Zfp532	0	0	0	0	0	0	0	0	0	0
														5330437I02Rik	0	0	0	0	0	0	0	0	0	0
														Sec11c	0	0	0	0	0	0	0	0	0	0
														BC053977	0	0	0	0	0	0	0	0	0	0
														Grp	0	0	0	0	0	0	0	0	0	0
														Rax	0	0	0	0	0	0	0	0	0	0
														Myo5b	0	0	0	0	0	0	0	0	0	0
														AK007214	0	0	0	0	0	0	0	0	0	0
														Dym	0	0	0	0	0	0	0	0	0	0
														AK008334	0	0	0	0	0	0	0	0	0	0
														Smad7	0	0	0	0	0	0	0	0	0	0
														Gm672	0	0	0	0	0	0	0	0	0	0
														Rnf165	0	0	0	0	0	0	0	0	0	0
														Haus1	0	0	0	0	0	0	0	0	0	0
														Atp5a1	0	0	0	0	0	0	0	0	0	0
														AK172459	0	0	0	0	0	0	0	0	0	0
														Pstpip2	0	0	0	0	0	0	0	0	0	0
														5430411K18Rik	0	0	0	0	0	0	0	0	0	0
														Ms4a1	0	0	0	0	0	0	0	0	0	0
														Ms4a5	0	0	0	0	0	0	0	0	0	0
														Ms4a7	0	0	0	0	0	0	0	0	0	0
														Ms4a4c	0	0	0	0	0	0	0	0	0	0
														Fam111a	0	0	0	0	0	0	0	0	0	0
														Glyat	0	0	0	0	0	0	0	0	0	0
														Olfr1442	0	0	0	0	0	0	1	1	1	1
														Olfr1443	0	0	0	0	0	0	1	1	1	1
														Keg1	0	0	0	0	0	0	0	0	0	0
														Cntf	0	0	0	0	0	0	0	0	0	0
														Zfp91	0	0	0	0	0	0	0	0	0	0
														Lpxn	0	0	0	0	0	0	0	0	0	0
														Olfr1444	0	0	0	0	0	0	1	1	1	1
														Olfr1445	0	0	0	0	0	0	1	1	1	1
														Olfr1446	0	0	0	0	0	0	1	1	1	1
														Olfr1447	0	0	0	0	0	0	1	1	1	1
														Rmnd1	0	0	0	0	0	0	0	0	0	0
														DQ696666	0	0	0	0	0	0	0	0	0	0
														Olfr1448	0	0	0	0	0	0	1	1	1	1
														Olfr1449	0	0	0	0	0	0	1	1	1	1
														Olfr1450	0	0	0	0	0	0	1	1	1	1
														AK053416	0	0	0	0	0	0	0	0	0	0
														Trpm3	0	0	0	0	0	0	0	0	0	0
														Dmrt3	0	0	0	0	0	0	0	0	0	0
														AK011408	0	0	0	0	0	0	0	0	0	0
														Dmrt2	0	0	0	0	0	0	0	0	0	0
														Slc16a12	0	0	0	0	0	0	0	0	0	0
														Pank1	0	0	0	0	0	0	0	0	0	0
														Kif20b	0	0	0	0	0	0	0	0	0	0
														Exoc6	0	0	0	0	0	0	0	0	0	0
														Cyp26a1	0	0	0	0	0	0	0	0	0	0
														Plce1	0	0	0	0	0	0	0	0	0	0
														Crtac1	0	0	0	0	0	0	0	0	0	0
														AK077353	0	0	0	0	0	0	0	0	0	0
														D19Ertd386e	0	0	0	0	0	0	0	0	0	0
														AK006610	0	0	0	0	0	0	0	0	0	0
														Cnnm1	0	0	0	0	0	0	0	0	0	0
														Nkx2-3	0	0	0	0	0	0	0	0	0	0
														AK035331	0	0	0	0	0	0	0	0	0	0
														Slc25a28	0	0	0	0	0	0	0	0	0	0
														Erlin1	0	0	0	0	0	0	0	0	0	0
														Chuk	0	0	0	0	0	0	0	0	0	0
														Cwf19l1	0	0	0	0	0	0	0	0	0	0
														Bloc1s2	0	0	0	0	0	0	0	0	0	0
														Scd3	0	0	0	0	0	0	0	0	0	0
														Wnt8b	0	0	0	0	0	0	0	0	0	0
														Sec31b	0	0	0	0	0	0	0	0	0	0
														Ndufb8	0	0	0	0	0	0	0	0	0	0
														Hif1an	0	0	0	0	0	0	0	0	0	0
														Gsto1	0	0	0	0	0	0	0	0	0	0
														Gsto2	0	0	0	0	0	0	0	0	0	0
														Itprip	0	0	0	0	0	0	0	0	0	0
														Ins1	0	0	0	0	0	0	0	0	0	0
														Tectb	0	0	0	0	0	0	0	0	0	1
														Gucy2g	0	0	0	0	0	0	0	0	0	0
														Acsl5	0	0	0	0	0	0	0	0	0	0
														Taf3	0	0	0	0	0	0	0	0	0	0
														Atp5c1	0	0	0	0	0	0	0	0	0	0
														Kin	0	0	0	0	0	0	0	0	0	0
														Itih2	0	0	0	0	0	0	0	0	0	0
														Itih5	0	0	0	0	0	0	0	0	0	0
														AK076687	0	0	0	0	0	0	0	0	0	0
														Sfmbt2	0	0	0	0	0	0	0	0	0	0
														AK136239	0	0	0	0	0	0	0	0	0	0
														Agps	0	0	0	0	0	0	0	0	0	0
														Ttc30b	0	0	0	0	0	0	0	0	0	0
														Ttc30a1	0	0	0	0	0	0	0	0	0	0
														Pde11a	0	0	0	0	0	0	0	0	0	0
														Gm14461	0	0	0	0	0	0	0	0	0	0
														Ube2e3	0	0	0	0	0	0	0	0	0	0
														Ppp1r1c	0	0	0	0	0	0	0	0	0	0
														Pde1a	0	0	0	0	0	0	0	0	0	0
														Olfr1014	0	0	0	0	0	0	1	1	1	1
														Olfr1015	0	0	0	0	0	0	1	1	1	1
														Olfr1016	0	0	0	0	0	0	1	1	1	1
														Olfr1018	0	0	0	0	0	0	1	1	1	1
														Olfr1019	0	0	0	0	0	0	1	1	1	1
														Olfr1020	0	0	0	0	0	0	1	1	1	1
														Olfr1022	0	0	0	0	0	0	1	1	1	1
														Olfr1023	0	0	0	0	0	0	1	1	1	1
														Olfr1024	0	0	0	0	0	0	1	1	1	1
														Olfr1026	0	0	0	0	0	0	1	1	1	1
														Olfr1028	0	0	0	0	0	0	0	0	0	0
														Olfr1029	0	0	0	0	0	0	1	1	1	1
														Olfr1030	0	0	0	0	0	0	1	1	1	1
														Olfr1208	0	0	0	0	0	0	1	1	1	1
														Olfr1209	0	0	0	0	0	0	1	1	1	1
														Olfr1211	0	0	0	0	0	0	1	1	1	1
														Olfr1212	0	0	0	0	0	0	1	1	1	1
														Olfr1213	0	0	0	0	0	0	1	1	1	1
														Olfr1214	0	0	0	0	0	0	1	1	1	1
														Olfr1215	0	0	0	0	0	0	1	1	1	1
														Olfr1216	0	0	0	0	0	0	1	1	1	1
														Olfr1217	0	0	0	0	0	0	1	1	1	1
														Olfr1257	0	0	0	0	0	0	1	1	1	1
														Olfr1258	0	0	0	0	0	0	1	1	1	1
														Olfr1259	0	0	0	0	0	0	1	1	1	1
														Olfr1260	0	0	0	0	0	0	1	1	1	1
														Olfr1261	0	0	0	0	0	0	1	1	1	1
														Olfr1262	0	0	0	0	0	0	1	1	1	1
														Olfr1263	0	0	0	0	0	0	1	1	1	1
														Olfr1264	0	0	0	0	0	0	1	1	1	1
														Olfr1265	0	0	0	0	0	0	1	1	1	1
														Olfr140	0	0	0	0	0	0	1	1	1	1
														Olfr1274-ps	0	0	0	0	0	0	0	0	0	0
														Ptprj	0	0	0	0	0	0	0	0	0	0
														Ldlrad3	0	0	0	0	0	0	0	0	0	0
														AK079670	0	0	0	0	0	0	0	0	0	0
														Gjd2	0	0	0	0	0	0	0	0	0	1
														C130080G10Rik	0	0	0	0	0	0	0	0	0	0
														Actc1	0	0	0	0	0	0	0	0	0	0
														C130080G10Rik	0	0	0	0	0	0	0	0	0	0
														Aqr	0	0	0	0	0	0	0	0	0	0
														Anapc1	0	0	0	0	0	0	0	0	0	0
														Mertk	0	0	0	0	1	1	0	0	0	0
														Fbln7	0	0	0	0	1	1	0	0	0	0
														Zc3h8	0	0	0	0	0	0	0	0	0	0
														AK040035	0	0	0	0	0	0	0	0	0	0
														Slc24a3	0	0	0	0	0	0	0	0	0	0
														Gm14092	0	0	0	0	0	0	0	0	0	0
														Dbndd2	0	0	0	0	0	0	0	0	0	0
														AK043662	0	0	0	0	0	0	0	0	0	0
														Wfdc2	0	0	0	0	0	0	0	0	0	0
														Spint3	0	0	0	0	0	0	0	0	0	0
														Spinlw1	0	0	0	0	0	0	0	0	0	0
														Wfdc8	0	0	0	0	0	0	0	0	0	0
														Wfdc6b	0	0	0	0	0	0	0	0	0	0
														Wfdc9	0	0	0	0	0	0	0	0	0	0
														Wfdc10	0	0	0	0	0	0	0	0	0	0
														Wfdc11	0	0	0	0	0	0	0	0	0	0
														Wfdc13	0	0	0	0	0	0	0	0	0	0
														Spint4	0	0	0	0	0	0	0	0	0	0
														Mc3r	0	0	0	0	0	0	0	0	0	0
														Aurka	0	0	0	0	0	0	0	0	0	0
														Cstf1	0	0	0	0	0	0	0	0	0	0
														2410001C21Rik	0	0	0	0	0	0	0	0	0	0
														Gcnt7	0	0	0	0	0	0	0	0	0	0
														1700029J11Rik	0	0	0	0	0	0	0	0	0	0
														Tcfap2c	0	0	0	0	0	0	0	0	0	0
														BC066135	0	0	0	0	0	0	0	0	0	0
														Gata5	0	0	0	0	0	0	0	0	0	0
														AK045814	0	0	0	0	0	0	0	0	0	0
														AK140896	0	0	0	0	0	0	0	0	0	0
														AK165607	0	0	0	0	0	0	0	0	0	0
														Slco4a1	0	0	0	0	0	0	0	0	0	0
														1600027N09Rik	0	0	0	0	0	0	0	0	0	0
														Ogfr	0	0	0	0	0	0	0	0	0	0
														Col9a3	0	0	0	0	0	0	0	0	0	0
														Tcfl5	0	0	0	0	0	0	0	0	0	0
														BC006779	0	0	0	0	0	0	0	0	0	0
														Gmeb2	0	0	0	0	0	0	0	0	0	0
														Stmn3	0	0	0	0	0	0	0	0	0	0
														Rtel1	0	0	0	0	0	0	0	0	0	0
														Zgpat	0	0	0	0	0	0	0	0	0	0
														Lime1	0	0	0	0	0	0	0	0	0	0
														AK082896	0	0	0	0	0	0	0	0	0	0
														Abhd16b	0	0	0	0	0	0	0	0	0	0
														C030034L19Rik	0	0	0	0	0	0	0	0	0	0
														Pag1	0	0	0	0	0	0	0	0	0	0
														Fabp5	0	0	0	0	0	0	0	0	0	0
														AK080657	0	0	0	0	0	0	0	0	0	0
														Naaladl2	0	0	0	0	0	0	0	0	0	0
														Mynn	0	0	0	0	0	0	0	0	0	0
														Lrrc34	0	0	0	0	0	0	0	0	0	0
														Lrriq4	0	0	0	0	0	0	0	0	0	0
														Lrrc31	0	0	0	0	0	0	0	0	0	0
														Kcnmb2	0	0	0	0	0	0	0	0	0	0
														AK006766	0	0	0	0	0	0	0	0	0	0
														AK021232	0	0	0	0	0	0	0	0	0	0
														Phf17	0	0	0	0	0	0	0	0	0	0
														Sclt1	0	0	0	0	0	0	0	0	0	0
														D3Ertd751e	0	0	0	0	0	0	0	0	0	0
														AK012035	0	0	0	0	0	0	0	0	0	0
														Pcdh10	0	0	0	0	1	1	0	0	0	0
														Maml3	0	0	0	0	0	0	0	0	0	0
														AK144834	0	0	0	0	0	0	0	0	0	0
														Fam198b	0	0	0	0	0	0	0	0	0	0
														Glt28d2	0	0	0	0	0	0	0	0	0	0
														Adar	0	0	0	0	0	0	0	0	0	0
														Chrnb2	0	0	0	0	0	0	0	0	0	1
														2500003M10Rik	0	0	0	0	0	0	0	0	0	0
														S100a1	0	0	0	0	0	0	0	0	0	0
														S100a13	0	0	0	0	0	0	0	0	0	0
														S100a14	0	0	0	0	0	0	0	0	0	0
														S100a16	0	0	0	0	0	0	0	0	0	0
														S100a3	0	0	0	0	0	0	0	0	0	0
														S100a4	0	0	0	0	0	0	0	0	0	0
														S100a5	0	0	0	0	0	0	0	0	0	0
														S100a6	0	0	0	0	0	0	0	0	0	0
														S100a7a	0	0	0	0	0	0	0	0	0	0
														S100a8	0	0	0	0	0	0	0	0	0	0
														S100a9	0	0	0	0	0	0	0	0	0	0
														Prr9	0	0	0	0	0	0	0	0	0	0
														Lelp1	0	0	0	0	0	0	0	0	0	0
														AK137696	0	0	0	0	0	0	0	0	0	0
														Sprr2a1	0	0	0	0	0	0	0	0	0	0
														Sprr2b	0	0	0	0	0	0	0	0	0	0
														Sprr2d	0	0	0	0	0	0	0	0	0	0
														Sprr2e	0	0	0	0	0	0	0	0	0	0
														Sprr2f	0	0	0	0	0	0	0	0	0	0
														Sprr2g	0	0	0	0	0	0	0	0	0	0
														Sprr2h	0	0	0	0	0	0	0	0	0	0
														Sprr2i	0	0	0	0	0	0	0	0	0	0
														Arnt	0	0	0	0	0	0	0	0	0	0
														Ctsk	0	0	0	0	0	0	0	0	0	0
														Ctss	0	0	0	0	0	0	0	0	0	0
														Golph3l	0	0	0	0	0	0	0	0	0	0
														Ensa	0	0	0	0	0	0	0	0	0	0
														Mcl1	0	0	0	0	0	0	0	0	0	0
														Adamtsl4	0	0	0	0	0	0	0	0	0	0
														Ecm1	0	0	0	0	0	0	0	0	0	0
														Tars2	0	0	0	0	0	0	0	0	0	0
														Rprd2	0	0	0	0	0	0	0	0	0	0
														Prpf3	0	0	0	0	0	0	0	0	0	0
														Mrps21	0	0	0	0	0	0	0	0	0	0
														AK044447	0	0	0	0	0	0	0	0	0	0
														Gm129	0	0	0	0	0	0	0	0	0	0
														BC028528	0	0	0	0	0	0	0	0	0	0
														Aph1a	0	0	0	0	0	0	0	0	0	0
														Car14	0	0	0	0	0	0	0	0	0	0
														Anp32e	0	0	0	0	0	0	0	0	0	0
														AK028005	0	0	0	0	0	0	0	0	0	0
														Plekho1	0	0	0	0	0	0	0	0	0	0
														Vps45	0	0	0	0	0	0	0	0	0	0
														Otud7b	0	0	0	0	0	0	0	0	0	0
														Mtmr11	0	0	0	0	0	0	0	0	0	0
														Fmo5	0	0	0	0	0	0	0	0	0	0
														Prkab2	0	0	0	0	0	0	0	0	0	0
														AK080051	0	0	0	0	0	0	0	0	0	0
														Sec22b	0	0	0	0	0	0	0	0	0	0
														AK047534	0	0	0	0	0	0	0	0	0	0
														Wdr3	0	0	0	0	0	0	0	0	0	0
														Gdap2	0	0	0	0	0	0	0	0	0	0
														AK015105	0	0	0	0	0	0	0	0	0	0
														Man1a2	0	0	0	0	0	0	0	0	0	0
														Vtcn1	0	0	0	0	0	0	0	0	0	0
														Trim45	0	0	0	0	0	0	0	0	0	0
														Ttf2	0	0	0	0	0	0	0	0	0	0
														Ptgfrn	0	0	0	0	0	0	0	0	0	0
														Cd2	0	0	0	0	1	1	0	0	0	0
														Atp1a1	0	0	0	0	0	0	0	0	0	0
														BC037703	0	0	0	0	0	0	0	0	0	0
														Trim33	0	0	0	0	0	0	0	0	0	0
														AK018929	0	0	0	0	0	0	0	0	0	0
														Ddx20	0	0	0	0	0	0	0	0	0	0
														6530418L21Rik	0	0	0	0	0	0	0	0	0	0
														BC051070	0	0	0	0	0	0	0	0	0	0
														2010016I18Rik	0	0	0	0	0	0	0	0	0	0
														Dennd2d	0	0	0	0	0	0	0	0	0	0
														Cept1	0	0	0	0	0	0	0	0	0	0
														Eps8l3	0	0	0	0	0	0	0	0	0	0
														4933431E20Rik	0	0	0	0	0	0	0	0	0	0
														Gstm5	0	0	0	0	0	0	0	0	0	0
														Gstm7	0	0	0	0	0	0	0	0	0	0
														Gstm6	0	0	0	0	0	0	0	0	0	0
														Gstm3	0	0	0	0	0	0	0	0	0	0
														Ntng1	0	0	0	0	0	0	0	0	0	0
														Col11a1	0	0	0	0	1	1	0	0	0	1
														AK132829	0	0	0	0	0	0	0	0	0	0
														Olfm3	0	0	0	0	0	0	0	0	0	0
														S1pr1	0	0	0	0	0	0	0	0	0	0
														Dph5	0	0	0	0	0	0	0	0	0	0
														Slc30a7	0	0	0	0	0	0	0	0	0	0
														Extl2	0	0	0	0	0	0	0	0	0	0
														Vcam1	0	0	0	0	1	1	0	0	0	0
														Gpr88	0	0	0	0	0	0	0	0	0	0
														Cdc14a	0	0	0	0	0	0	0	0	0	0
														Rtcd1	0	0	0	0	0	0	0	0	0	0
														Dbt	0	0	0	0	0	0	0	0	0	0
														Lrrc39	0	0	0	0	0	0	0	0	0	0
														Ccdc76	0	0	0	0	0	0	0	0	0	0
														Sass6	0	0	0	0	0	0	0	0	0	0
														Hiat1	0	0	0	0	0	0	0	0	0	0
														Agl	0	0	0	0	0	0	0	0	0	0
														Frrs1	0	0	0	0	0	0	0	0	0	0
														Palmd	0	0	0	0	0	0	0	0	0	0
														D3Bwg0562e	0	0	0	0	0	0	0	0	0	0
														4833424O15Rik	0	0	0	0	0	0	0	0	0	0
														AK076759	0	0	0	0	0	0	0	0	0	0
														Dpyd	0	0	0	0	0	0	0	0	0	0
														Ptbp2	0	0	0	0	0	0	0	0	0	0
														B930007M17Rik	0	0	0	0	0	0	0	0	0	0
														AK029620	0	0	0	0	0	0	0	0	0	0
														Lmo4	0	0	0	0	0	0	0	0	0	0
														Clvs1	0	0	0	0	0	0	0	0	0	0
														Tmem64	0	0	0	0	0	0	0	0	0	0
														Mmp16	0	0	0	0	0	0	0	0	0	0
														Manea	0	0	0	0	0	0	0	0	0	0
														Dcaf10	0	0	0	0	0	0	0	0	0	0
														Mcart1	0	0	0	0	0	0	0	0	0	0
														Shb	0	0	0	0	0	0	0	0	0	0
														Shb	0	0	0	0	0	0	0	0	0	0
														AK044089	0	0	0	0	0	0	0	0	0	0
														Gm829	0	0	0	0	0	0	0	0	0	0
														Tmod1	0	0	0	0	0	0	0	0	0	0
														Ncbp1	0	0	0	0	0	0	0	0	0	0
														Xpa	0	0	0	0	0	0	0	0	0	0
														Acnat1	0	0	0	0	0	0	0	0	0	0
														AK018513	0	0	0	0	0	0	0	0	0	0
														Baat	0	0	0	0	0	0	0	0	0	0
														Mrpl50	0	0	0	0	0	0	0	0	0	0
														Zfp189	0	0	0	0	0	0	0	0	0	0
														Aldob	0	0	0	0	0	0	0	0	0	0
														2810432L12Rik	0	0	0	0	0	0	0	0	0	0
														Rnf20	0	0	0	0	0	0	0	0	0	0
														Ppp3r2	0	0	0	0	0	0	0	0	0	0
														Zfp462	0	0	0	0	0	0	0	0	0	0
														Dbc1	0	0	0	0	0	0	0	0	0	0
														Ptprd	0	0	0	0	0	0	0	0	0	0
														Bnc2	0	0	0	0	0	0	0	0	0	0
														DQ562993	0	0	0	0	0	0	0	0	0	0
														DQ707012	0	0	0	0	0	0	0	0	0	0
														DQ540346	0	0	0	0	0	0	0	0	0	0
														DQ569721	0	0	0	0	0	0	0	0	0	0
														DQ700539	0	0	0	0	0	0	0	0	0	0
														DQ726285	0	0	0	0	0	0	0	0	0	0
														DQ699817	0	0	0	0	0	0	0	0	0	0
														DQ688238	0	0	0	0	0	0	0	0	0	0
														DQ723665	0	0	0	0	0	0	0	0	0	0
														DQ721038	0	0	0	0	0	0	0	0	0	0
														DQ724387	0	0	0	0	0	0	0	0	0	0
														DQ710363	0	0	0	0	0	0	0	0	0	0
														DQ560189	0	0	0	0	0	0	0	0	0	0
														DQ687895	0	0	0	0	0	0	0	0	0	0
														DQ551326	0	0	0	0	0	0	0	0	0	0
														DQ688556	0	0	0	0	0	0	0	0	0	0
														DQ555438	0	0	0	0	0	0	0	0	0	0
														DQ709488	0	0	0	0	0	0	0	0	0	0
														DQ722152	0	0	0	0	0	0	0	0	0	0
														DQ698901	0	0	0	0	0	0	0	0	0	0
														DQ704356	0	0	0	0	0	0	0	0	0	0
														DQ550973	0	0	0	0	0	0	0	0	0	0
														DQ707201	0	0	0	0	0	0	0	0	0	0
														DQ724562	0	0	0	0	0	0	0	0	0	0
														Tek	0	0	0	0	1	1	0	0	0	0
														4930579C15Rik	0	0	0	0	0	0	0	0	0	0
														Jun	0	0	0	0	0	0	0	0	0	0
														BC042782	0	0	0	0	0	0	0	0	0	0
														AK089375	0	0	0	0	0	0	0	0	0	0
														Prdm16	0	0	0	0	0	0	0	0	0	0
														5930403L14Rik	0	0	0	0	0	0	0	0	0	0
														AK083203	0	0	0	0	0	0	0	0	0	0
														Pion	0	0	0	0	0	0	0	0	0	0
														Ccdc146	0	0	0	0	0	0	0	0	0	0
														Fgl2	0	0	0	0	0	0	0	0	0	0
														Fam185a	0	0	0	0	0	0	0	0	0	0
														Kcnip4	0	0	0	0	0	0	0	0	0	0
														Anapc4	0	0	0	0	0	0	0	0	0	0
														AK017148	0	0	0	0	0	0	0	0	0	0
														AK087045	0	0	0	0	0	0	0	0	0	0
														Slc34a2	0	0	0	0	0	0	0	0	0	0
														Ssh1	0	0	0	0	0	0	0	0	0	0
														Dao	0	0	0	0	0	0	0	0	0	0
														Svop	0	0	0	0	0	0	0	0	0	0
														Usp30	0	0	0	0	0	0	0	0	0	0
														Alkbh2	0	0	0	0	0	0	0	0	0	0
														Ung	0	0	0	0	0	0	0	0	0	0
														Il31	0	0	0	0	0	0	0	0	0	0
														Lrrc43	0	0	0	0	0	0	0	0	0	0
														B3gnt4	0	0	0	0	0	0	0	0	0	0
														Diablo	0	0	0	0	0	0	0	0	0	0
														Vps33a	0	0	0	0	0	0	0	0	0	0
														Clip1	0	0	0	0	0	0	0	0	0	0
														Tmem132c	0	0	0	0	0	0	0	0	0	0
														Tmem132d	0	0	0	0	0	0	0	0	0	0
														Rimbp2	0	0	0	0	0	0	0	0	0	0
														Stx2	0	0	0	0	0	0	0	0	0	0
														Ran	0	0	0	0	0	0	0	0	0	0
														Gpr133	0	0	0	0	0	0	0	0	0	0
														Zcwpw1	0	0	0	0	0	0	0	0	0	0
														Pilra	0	0	0	0	0	0	0	0	0	0
														Pilrb1	0	0	0	0	0	0	0	0	0	0
														AK036462	0	0	0	0	0	0	0	0	0	0
														Pilrb2	0	0	0	0	0	0	0	0	0	0
														Cyp3a13	0	0	0	0	0	0	0	0	0	0
														Gjc3	0	0	0	0	0	0	0	0	0	1
														Azgp1	0	1	0	1	1	1	0	0	0	0
														Fam20c	0	0	0	0	0	0	0	0	0	0
														Stard13	0	0	0	0	0	0	0	0	0	0
														Rfc3	0	0	0	0	0	0	0	0	0	0
														Cav1	0	0	0	0	0	0	0	0	0	0
														Met	0	0	0	0	0	0	0	0	0	0
														Kcnd2	0	0	0	0	0	0	0	0	0	0
														Tspan12	0	0	0	0	0	0	0	0	0	0
														AK040992	0	0	0	0	0	0	0	0	0	0
														Ing3	0	0	0	0	0	0	0	0	0	0
														A430107O13Rik	0	0	0	0	0	0	0	0	0	0
														Grm8	0	0	0	0	0	0	0	1	1	1
														AK076883	0	0	0	0	0	0	0	0	0	0
														Plxna4	0	0	0	0	0	0	0	0	0	0
														9330158H04Rik	0	0	0	0	0	0	0	0	0	0
														9330158H04Rik	0	0	0	0	0	0	0	0	0	0
														Ptn	0	0	0	0	0	0	0	0	0	0
														Ptn	0	0	0	0	0	0	0	0	0	0
														Dgki	0	0	0	0	0	0	0	0	0	0
														AK043004	0	0	0	0	0	0	0	0	0	0
														AK145307	0	0	0	0	0	0	0	0	0	0
														AK076597	0	0	0	0	0	0	0	0	0	0
														Chn2	0	0	0	0	0	0	0	0	0	0
														Herc6	0	0	0	0	0	0	0	0	0	0
														Lancl2	0	0	0	0	0	0	0	0	0	0
														Vopp1	0	0	0	0	0	0	0	0	0	0
														Grid2	0	0	0	0	0	0	0	0	0	0
														Rpia	0	0	0	0	0	0	0	0	0	0
														Gfpt1	0	0	0	0	0	0	0	0	0	0
														D6Ertd527e	0	0	0	0	0	0	0	0	0	0
														Antxr1	0	0	0	0	1	1	0	0	0	0
														Chchd6	0	0	0	0	0	0	0	0	0	0
														Txnrd3	0	0	0	0	0	0	0	0	0	0
														Vmn1r40	0	0	0	0	0	0	0	0	1	1
														Vmn1r41	0	0	0	0	0	0	0	0	1	1
														Slc25a26	0	0	0	0	0	0	0	0	0	0
														Lrig1	0	0	0	0	0	0	0	0	0	0
														Cntn3	0	0	0	0	0	0	0	0	0	0
														1700054K19Rik	0	0	0	0	0	0	0	0	0	0
														Lmcd1	0	0	0	0	0	0	0	0	0	0
														AK087115	0	0	0	0	0	0	0	0	0	0
														D630042P16Rik	0	0	0	0	0	0	0	0	0	0
														Cav3	0	0	0	0	0	0	0	0	0	0
														Oxtr	0	0	0	0	0	0	0	0	0	0
														Hrh1	0	0	0	0	0	0	0	0	0	0
														Pparg	0	0	0	0	0	0	0	0	0	0
														Tsen2	0	0	0	0	0	0	0	0	0	0
														Raf1	0	0	0	0	0	0	0	0	0	0
														Tmem40	0	0	0	0	0	0	0	0	0	0
														Cand2	0	0	0	0	0	0	0	0	0	0
														Rpl32	0	0	0	0	0	0	0	0	0	0
														Rassf4	0	0	0	0	0	0	0	0	0	0
														8430408G22Rik	0	0	0	0	0	0	0	0	0	0
														Tmem72	0	0	0	0	0	0	0	0	0	0
														AK135471	0	0	0	0	0	0	0	0	0	0
														AK162833	0	0	0	0	0	0	0	0	0	0
														AK006540	0	0	0	0	0	0	0	0	0	0
														Cacna1c	0	0	0	0	0	0	0	0	0	0
														Efcab4b	0	0	0	0	0	0	0	0	0	0
														Prmt8	0	0	0	0	0	0	0	0	0	0
														Tspan9	0	0	0	0	0	0	0	0	0	0
														AK033854	0	0	0	0	0	0	0	0	0	0
														DQ717093	0	0	0	0	0	0	0	0	0	0
														DQ545796	0	0	0	0	0	0	0	0	0	0
														DQ720715	0	0	0	0	0	0	0	0	0	0
														DQ716540	0	0	0	0	0	0	0	0	0	0
														DQ725877	0	0	0	0	0	0	0	0	0	0
														DQ714635	0	0	0	0	0	0	0	0	0	0
														DQ697053	0	0	0	0	0	0	0	0	0	0
														DQ708973	0	0	0	0	0	0	0	0	0	0
														DQ721319	0	0	0	0	0	0	0	0	0	0
														DQ564920	0	0	0	0	0	0	0	0	0	0
														DQ694705	0	0	0	0	0	0	0	0	0	0
														Tead4	0	0	0	0	0	0	0	0	0	0
														DQ699682	0	0	0	0	0	0	0	0	0	0
														Tulp3	0	0	0	0	0	0	0	0	0	0
														Gucy2c	0	0	0	0	0	0	0	0	0	0
														Hist4h4	0	0	0	0	0	0	0	0	0	0
														H2afj	0	0	0	0	0	0	0	0	0	0
														Wbp11	0	0	0	0	0	0	0	0	0	0
														BC049715	0	0	0	0	0	0	0	0	0	0
														C030030A07Rik	0	0	0	0	0	0	0	0	0	0
														Art4	0	0	0	0	0	0	0	0	0	0
														Mgp	0	0	0	0	0	0	0	0	0	0
														Erp27	0	0	0	0	0	0	0	0	0	0
														Arhgdib	0	0	0	0	0	0	0	0	0	0
														Pde6h	0	0	0	0	0	0	0	0	0	1
														Psg23	0	0	0	0	0	0	0	0	0	0
														Psg21	0	0	0	0	0	0	0	0	0	0
														Psg22	0	0	0	0	0	0	0	0	0	0
														Psg19	0	0	0	0	0	0	0	0	0	0
														Psg17	0	0	0	0	0	0	0	0	0	0
														Mill2	0	0	0	0	0	0	0	0	0	0
														Pglyrp1	0	0	0	0	0	0	0	0	0	0
														Ccdc61	0	0	0	0	0	0	0	0	0	0
														Il28a	0	0	0	0	0	0	0	0	0	0
														Il28b	0	0	0	0	0	0	0	0	0	0
														Sycn	0	0	0	0	0	0	0	0	0	0
														Nccrp1	0	0	0	0	0	0	0	0	0	0
														Pak4	0	0	0	0	0	0	0	0	0	0
														C330005M16Rik	0	0	0	0	0	0	0	0	0	0
														Rinl	0	0	0	0	0	0	0	0	0	0
														Hnrnpl	0	0	0	0	0	0	0	0	0	0
														Ech1	0	0	0	0	0	0	0	0	0	0
														Lgals4	0	0	0	0	0	0	0	0	0	0
														Lgals7	0	0	0	0	0	0	0	0	0	0
														Actn4	0	0	0	0	0	0	0	0	0	0
														Eif3k	0	0	0	0	0	0	0	0	0	0
														Map4k1	0	0	0	0	0	0	0	0	0	0
														Ryr1	0	0	0	0	0	0	0	0	0	0
														AK048019	0	0	0	0	0	0	0	0	0	0
														Rasgrp4	0	0	0	0	0	0	0	0	0	0
														Zfp507	0	0	0	0	0	0	0	0	0	0
														Zfp936	0	0	0	0	0	0	0	0	0	0
														Zfp715	0	0	0	0	0	0	0	0	0	0
														Siglec5	0	0	0	0	1	1	0	0	0	0
														Siglecg	0	0	0	0	0	0	0	0	0	0
														Lim2	0	0	0	0	0	0	0	0	0	0
														Nkg7	0	0	0	0	0	0	0	0	0	0
														Cldnd2	0	0	0	0	0	0	0	0	0	0
														Etfb	0	0	0	0	0	0	0	0	0	0
														Vsig10l	0	0	0	0	0	0	0	0	0	0
														Iglon5	0	0	0	0	0	0	0	0	0	0
														4931406B18Rik	0	0	0	0	0	0	0	0	0	0
														BC100510	0	0	0	0	0	0	0	0	0	0
														Klk1b27	0	0	0	0	0	0	0	0	0	0
														Klk1b21	0	0	0	0	0	0	0	0	0	0
														Klk1b22	0	0	0	0	0	0	0	0	0	0
														Klk1b16	0	0	0	0	0	0	0	0	0	0
														Klk1b24	0	0	0	0	0	0	0	0	0	0
														Klk1b3	0	0	0	0	0	0	0	0	0	0
														Klk1b4	0	0	0	0	0	0	0	0	0	0
														Klk1b5	0	0	0	0	0	0	0	0	0	0
														Klk1	0	0	0	0	0	0	0	0	0	0
														1700028J19Rik	0	0	0	0	0	0	0	0	0	0
														Nell1	0	0	0	0	1	1	0	0	0	0
														AK006968	0	0	0	0	0	0	0	0	0	0
														4933405O20Rik	0	0	0	0	0	0	0	0	0	0
														Gabrg3	0	0	0	0	0	0	0	0	0	0
														Klf13	0	0	0	0	0	0	0	0	0	0
														Apba2	0	0	0	0	0	0	0	0	0	0
														H47	0	0	0	0	0	0	0	0	0	0
														Chsy1	0	0	0	0	0	0	0	0	0	0
														Lrrk1	0	0	0	0	0	0	0	0	0	0
														Aldh1a3	0	0	0	0	0	0	0	0	0	0
														Mctp2	0	0	0	0	0	0	0	0	0	0
														AK046300	0	0	0	0	0	0	0	0	0	0
														AK133139	0	0	0	0	0	0	0	0	0	0
														AK043101	0	0	0	0	0	0	0	0	0	0
														Rgma	0	0	0	0	0	0	0	0	0	0
														Chd2	0	0	0	0	0	0	0	0	0	0
														Blm	0	0	0	0	0	0	0	0	0	0
														Crtc3	0	0	0	0	0	0	0	0	0	0
														AK155169	0	0	0	0	0	0	0	0	0	0
														Zfp592	0	0	0	0	0	0	0	0	0	0
														Alpk3	0	0	0	0	0	0	0	0	0	0
														Slc28a1	0	0	0	0	0	0	0	0	0	0
														AK076849	0	0	0	0	0	0	0	0	0	0
														Mex3b	0	0	0	0	0	0	0	0	0	0
														Ctsc	0	0	0	0	0	0	0	0	0	0
														AK170353	0	0	0	0	0	0	0	0	0	0
														Wnt11	0	0	0	0	0	0	0	0	0	0
														Uvrag	0	0	0	0	0	0	0	0	0	0
														Mogat2	0	0	0	0	0	0	0	0	0	0
														Mtap6	0	0	0	0	0	0	0	0	0	0
														Serpinh1	0	0	0	0	0	0	0	0	0	0
														AK205936	0	0	0	0	0	0	0	0	0	0
														Gdpd5	0	0	0	0	0	0	0	0	0	0
														Klhl35	0	0	0	0	0	0	0	0	0	0
														Rps3	0	0	0	0	0	0	0	0	0	0
														Snord15a	0	0	0	0	0	0	0	0	0	0
														Arrb1	0	0	0	0	0	0	0	0	0	0
														Olfr243	0	0	0	0	0	0	1	1	1	1
														Olfr629	0	0	0	0	0	0	1	1	1	1
														Olfr630	0	0	0	0	0	0	1	1	1	1
														Olfr69	0	0	0	0	0	0	1	1	1	1
														Olfr68	0	0	0	0	0	0	1	1	1	1
														Olfr67	0	0	0	0	0	0	1	1	1	1
														Hbb-b1	0	0	0	0	0	0	0	0	0	0
														Beta-s	0	0	0	0	0	0	0	0	0	0
														Hbb-bh1	0	0	0	0	0	0	0	0	0	0
														Hbb-y	0	0	0	0	0	0	0	0	0	0
														Olfr66	0	0	0	0	0	0	1	1	1	1
														Olfr64	0	0	0	0	0	0	1	1	1	1
														Olfr632	0	0	0	0	0	0	1	1	1	1
														Olfr633	0	0	0	0	0	0	1	1	1	1
														Olfr635	0	0	0	0	0	0	1	1	1	1
														Olfr638	0	0	0	0	0	0	1	1	1	1
														Olfr639	0	0	0	0	0	0	1	1	1	1
														Olfr640	0	0	0	0	0	0	1	1	1	1
														Olfr641	0	0	0	0	0	0	1	1	1	1
														Olfr642	0	0	0	0	0	0	1	1	1	1
														Olfr643	0	0	0	0	0	0	1	1	1	1
														Olfr644	0	0	0	0	0	0	1	1	1	1
														Olfr645	0	0	0	0	0	0	1	1	1	1
														Olfr646	0	0	0	0	0	0	1	1	1	1
														Ubqln3	0	0	0	0	0	0	0	0	0	0
														Ubqlnl	0	0	0	0	0	0	0	0	0	0
														E030002O03Rik	0	0	0	0	0	0	0	0	0	0
														Olfr648	0	0	0	0	0	0	1	1	1	1
														Olfr649	0	0	0	0	0	0	1	1	1	1
														Trim6	0	0	0	0	0	0	0	0	0	0
														Trim34a	0	0	0	0	0	0	0	0	0	0
														Olfr473	0	0	0	0	0	0	1	1	1	1
														Olfr474	0	0	0	0	0	0	1	1	1	1
														Olfr476	0	0	0	0	0	0	1	1	1	1
														Olfr477	0	0	0	0	0	0	1	1	1	1
														Olfr478	0	0	0	0	0	0	1	1	1	1
														Olfr479	0	0	0	0	0	0	1	1	1	1
														Olfr480	0	0	0	0	0	0	1	1	1	1
														Olfr481	0	0	0	0	0	0	1	1	1	1
														Olfr482	0	0	0	0	0	0	1	1	1	1
														Olfr518	0	0	0	0	0	0	1	1	1	1
														Olfr519	0	0	0	0	0	0	1	1	1	1
														Nlrp10	0	0	0	0	0	0	0	0	0	0
														Eif3f	0	0	0	0	0	0	0	0	0	0
														Tub	0	0	0	0	0	0	0	0	0	1
														Ric3	0	0	0	0	0	0	0	0	0	0
														AK005418	0	0	0	0	0	0	0	0	0	0
														Zfp143	0	0	0	0	0	0	0	0	0	0
														Wee1	0	0	0	0	0	0	0	0	0	0
														Swap70	0	0	0	0	0	0	0	0	0	0
														Rnf141	0	0	0	0	0	0	0	0	0	0
														Lyve1	0	0	0	0	1	1	0	0	0	0
														Mrvi1	0	0	0	0	0	0	0	0	0	0
														AK043303	0	0	0	0	0	0	0	0	0	0
														Tmc5	0	0	0	0	0	0	0	0	0	0
														AK199258	0	0	0	0	0	0	0	0	0	0
														Gde1	0	0	0	0	0	0	0	0	0	0
														6330503K22Rik	0	0	0	0	0	0	0	0	0	0
														9030624J02Rik	0	0	0	0	0	0	0	0	0	0
														Gpr139	0	0	0	0	0	0	0	0	0	0
														Acsm2	0	0	0	0	0	0	0	0	0	0
														AK143933	0	0	0	0	0	0	0	0	0	0
														Acsm1	0	0	0	0	0	0	0	0	0	0
														Acsm4	0	0	0	0	0	0	0	0	0	0
														Thumpd1	0	0	0	0	0	0	0	0	0	0
														Slc5a11	0	0	0	0	0	0	0	0	0	0
														Arhgap17	0	0	0	0	0	0	0	0	0	0
														Lcmt1	0	0	0	0	0	0	0	0	0	0
														AK017137	0	0	0	0	0	0	0	0	0	0
														Jmjd5	0	0	0	0	0	0	0	0	0	0
														Nsmce1	0	0	0	0	0	0	0	0	0	0
														Itgad	0	0	0	0	1	1	0	0	0	0
														AK080247	0	0	0	0	0	0	0	0	0	0
														AK007137	0	0	0	0	0	0	0	0	0	0
														Cox6a2	0	0	0	0	0	0	0	0	0	0
														9130023H24Rik	0	0	0	0	0	0	0	0	0	0
														Armc5	0	0	0	0	0	0	0	0	0	0
														Tgfb1i1	0	0	0	0	0	0	0	0	0	0
														Slc5a2	0	0	0	0	0	0	0	0	0	0
														BC017158	0	0	0	0	0	0	0	0	0	0
														Rgs10	0	0	0	0	0	0	0	0	0	0
														Tial1	0	0	0	0	0	0	0	0	0	0
														Shank2	0	0	0	0	0	0	0	0	0	0
														Cttn	0	0	0	0	0	0	0	0	0	0
														Sox1	0	0	0	0	0	0	0	0	0	0
														AK021128	0	0	0	0	0	0	0	0	0	0
														Cln8	0	0	0	0	0	0	0	0	0	1
														Arhgef10	0	0	0	0	0	0	0	0	0	0
														Kbtbd11	0	0	0	0	0	0	0	0	0	0
														BB014433	0	0	0	0	0	0	0	0	0	0
														Myom2	0	0	0	0	0	0	0	0	0	0
														Csmd1	0	0	0	0	0	0	0	0	0	0
														1810011O10Rik	0	0	0	0	0	0	0	0	0	0
														Ido2	0	0	0	0	0	0	0	0	0	0
														Ido1	0	0	0	0	0	0	0	0	0	0
														Zfp353	0	0	0	0	0	0	0	0	0	0
														Pdlim3	0	0	0	0	0	0	0	0	0	0
														Ccdc110	0	0	0	0	0	0	0	0	0	0
														1700029J07Rik	0	0	0	0	0	0	0	0	0	0
														Ufsp2	0	0	0	0	0	0	0	0	0	0
														Ankrd37	0	0	0	0	0	0	0	0	0	0
														Lrp2bp	0	0	0	0	0	0	0	0	0	0
														4933411K20Rik	0	0	0	0	0	0	0	0	0	0
														Slc25a4	0	0	0	0	0	0	0	0	0	0
														Helt	0	0	0	0	0	0	0	0	0	0
														Enpp6	0	0	0	0	0	0	0	0	0	0
														AK141748	0	0	0	0	0	0	0	0	0	0
														Stox2	0	0	0	0	0	0	0	0	0	0
														Sh3rf1	0	0	0	0	0	0	0	0	0	0
														AK005580	0	0	0	0	0	0	0	0	0	0
														Tll1	0	0	0	0	0	0	0	0	0	0
														Sh2d4a	0	0	0	0	0	0	0	0	0	0
														Mcm5	0	0	0	0	0	0	0	0	0	0
														Rasd2	0	0	0	0	0	0	0	0	0	0
														Gm10649	0	0	0	0	0	0	0	0	0	0
														Arhgap10	0	0	0	0	0	0	0	0	0	0
														AK166159	0	0	0	0	0	0	0	0	0	0
														Prmt10	0	0	0	0	0	0	0	0	0	0
														Tmem184c	0	0	0	0	0	0	0	0	0	0
														AK017010	0	0	0	0	0	0	0	0	0	0
														AK018991	0	0	0	0	0	0	0	0	0	0
														Ednra	0	0	0	0	0	0	0	0	0	1
														Ttc29	0	0	0	0	0	0	0	0	0	0
														Hhip	0	0	0	0	0	0	0	0	0	0
														Tbc1d9	0	0	0	0	0	0	0	0	0	0
														AK217941	0	0	0	0	0	0	0	0	0	0
														Ucp1	0	0	0	0	0	0	0	0	0	0
														Elmod2	0	0	0	0	0	0	0	0	0	0
														BC049805	0	0	0	0	0	0	0	0	0	0
														Ptger1	0	0	0	0	0	0	0	0	0	0
														Pkn1	0	0	0	0	0	0	0	0	0	0
														Ddx39	0	0	0	0	0	0	0	0	0	0
														Cd97	0	0	0	0	1	1	0	0	0	0
														AK139810	0	0	0	0	0	0	0	0	0	0
														4933402J07Rik	0	0	0	0	0	0	0	0	0	0
														AK007095	0	0	0	0	0	0	0	0	0	0
														Zfp423	0	0	0	0	0	0	0	0	0	0
														Tox3	0	0	0	0	0	0	0	0	0	0
														AK019563	0	0	0	0	0	0	0	0	0	0
														AK049522	0	0	0	0	0	0	0	0	0	0
														DQ699365	0	0	0	0	0	0	0	0	0	0
														DQ688327	0	0	0	0	0	0	0	0	0	0
														DQ686227	0	0	0	0	0	0	0	0	0	0
														DQ703578	0	0	0	0	0	0	0	0	0	0
														DQ567429	0	0	0	0	0	0	0	0	0	0
														DQ689766	0	0	0	0	0	0	0	0	0	0
														DQ712402	0	0	0	0	0	0	0	0	0	0
														DQ549220	0	0	0	0	0	0	0	0	0	0
														DQ707575	0	0	0	0	0	0	0	0	0	0
														DQ561275	0	0	0	0	0	0	0	0	0	0
														DQ708574	0	0	0	0	0	0	0	0	0	0
														DQ556184	0	0	0	0	0	0	0	0	0	0
														DQ712628	0	0	0	0	0	0	0	0	0	0
														DQ553589	0	0	0	0	0	0	0	0	0	0
														DQ557413	0	0	0	0	0	0	0	0	0	0
														DQ704895	0	0	0	0	0	0	0	0	0	0
														DQ705620	0	0	0	0	0	0	0	0	0	0
														DQ716653	0	0	0	0	0	0	0	0	0	0
														DQ709229	0	0	0	0	0	0	0	0	0	0
														DQ555272	0	0	0	0	0	0	0	0	0	0
														DQ704437	0	0	0	0	0	0	0	0	0	0
														DQ720628	0	0	0	0	0	0	0	0	0	0
														DQ552986	0	0	0	0	0	0	0	0	0	0
														DQ724813	0	0	0	0	0	0	0	0	0	0
														DQ558885	0	0	0	0	0	0	0	0	0	0
														AB251138	0	0	0	0	0	0	0	0	0	0
														DQ703386	0	0	0	0	0	0	0	0	0	0
														DQ711544	0	0	0	0	0	0	0	0	0	0
														AK016594	0	0	0	0	0	0	0	0	0	0
														Pdp2	0	0	0	0	0	0	0	0	0	0
														Cdh16	0	0	0	0	1	1	0	0	0	0
														Rrad	0	0	0	0	0	0	0	0	0	0
														Fam96b	0	0	0	0	0	0	0	0	0	0
														AK006980	0	0	0	0	0	0	0	0	0	0
														Adamts18	0	0	0	0	0	0	0	0	0	0
														Wwox	0	0	0	0	0	0	0	0	0	0
														Cdh13	0	0	0	0	1	1	0	0	0	0
														AK085792	0	0	0	0	0	0	0	0	0	0
														Wfdc1	0	0	0	0	0	0	0	0	0	0
														Atp2c2	0	0	0	0	0	0	0	0	0	0
														4632415K11Rik	0	0	0	0	0	0	0	0	0	0
														AK209885	0	0	0	0	0	0	0	0	0	0
														Klhl36	0	0	0	0	0	0	0	0	0	0
														4933403G14Rik	0	0	0	0	0	0	0	0	0	0
														Ntpcr	0	0	0	0	0	0	0	0	0	0
														Pcnxl2	0	0	0	0	0	0	0	0	0	0
														Nrp1	0	0	0	0	1	1	0	0	0	0
														AK050336	0	0	0	0	0	0	0	0	0	0
														Itgb1	0	0	0	0	1	1	0	0	0	0
														Casp1	0	0	0	0	0	0	0	0	0	0
														Casp4	0	0	0	0	0	0	0	0	0	0
														Casp12	0	0	0	0	0	0	0	0	0	0
														Fat3	0	0	0	0	1	1	0	0	0	0
														Bbs9	0	0	0	0	0	0	0	0	0	0
														Npsr1	0	0	0	0	0	0	0	0	0	0
														Dpy19l2	0	0	0	0	0	0	0	0	0	0
														Ntm	0	0	0	0	1	1	0	0	0	0
														Cdon	0	0	0	0	1	1	0	0	0	0
														Olfr877	0	0	0	0	0	0	1	1	1	1
														Olfr145	0	0	0	0	0	0	1	1	1	1
														Olfr878	0	0	0	0	0	0	1	1	1	1
														Olfr881	0	0	0	0	0	0	1	1	1	1
														Olfr883	0	0	0	0	0	0	1	1	1	1
														Olfr884	0	0	0	0	0	0	1	1	1	1
														Olfr885	0	0	0	0	0	0	1	1	1	1
														Olfr887	0	0	0	0	0	0	1	1	1	1
														Olfr888	0	0	0	0	0	0	1	1	1	1
														Olfr889	0	0	0	0	0	0	1	1	1	1
														Olfr891	0	0	0	0	0	0	1	1	1	1
														Olfr893	0	0	0	0	0	0	1	1	1	1
														Olfr894	0	0	0	0	0	0	1	1	1	1
														Olfr143	0	0	0	0	0	0	1	1	1	1
														Olfr895	0	0	0	0	0	0	1	1	1	1
														Olfr25	0	0	0	0	0	0	1	1	1	1
														Olfr898	0	0	0	0	0	0	1	1	1	1
														Olfr250	0	0	0	0	0	0	1	1	1	1
														Olfr251	0	0	0	0	0	0	1	1	1	1
														Olfr147	0	0	0	0	0	0	1	1	1	1
														Olfr901	0	0	0	0	0	0	1	1	1	1
														Olfr902	0	0	0	0	0	0	1	1	1	1
														Olfr904	0	0	0	0	0	0	1	1	1	1
														Olfr905	0	0	0	0	0	0	1	1	1	1
														Olfr906	0	0	0	0	0	0	1	1	1	1
														Olfr907	0	0	0	0	0	0	1	1	1	1
														Olfr908	0	0	0	0	0	0	1	1	1	1
														Olfr911-ps1	0	0	0	0	0	0	0	0	0	0
														Olfr910	0	0	0	0	0	0	1	1	1	1
														Olfr912	0	0	0	0	0	0	1	1	1	1
														Olfr915	0	0	0	0	0	0	0	0	0	0
														Olfr917	0	0	0	0	0	0	1	1	1	1
														Olfr918	0	0	0	0	0	0	1	1	1	1
														Olfr919	0	0	0	0	0	0	1	1	1	1
														Vwa5a	0	0	0	0	0	0	0	0	0	0
														Olfr920	0	0	0	0	0	0	1	1	1	1
														Olfr921	0	0	0	0	0	0	1	1	1	1
														Olfr959	0	0	0	0	0	0	1	1	1	1
														AW551984	0	0	0	0	0	0	0	0	0	0
														Olfr148	0	0	0	0	0	0	1	1	1	1
														Olfr960	0	0	0	0	0	0	1	1	1	1
														Olfr961	0	0	0	0	0	0	1	1	1	1
														Olfr963	0	0	0	0	0	0	1	1	1	1
														Olfr229	0	0	0	0	0	0	1	1	1	1
														Olfr975	0	0	0	0	0	0	1	1	1	1
														Olfr978	0	0	0	0	0	0	1	1	1	1
														Olfr979	0	0	0	0	0	0	1	1	1	1
														Olfr980	0	0	0	0	0	0	1	1	1	1
														Olfr981	0	0	0	0	0	0	1	1	1	1
														Gramd1b	0	0	0	0	0	0	0	0	0	0
														AK142431	0	0	0	0	0	0	0	0	0	0
														9030425E11Rik	0	0	0	0	0	0	0	0	0	0
														Trim29	0	0	0	0	0	0	0	0	0	0
														AK005635	0	0	0	0	0	0	0	0	0	0
														Tmprss13	0	0	0	0	0	0	0	0	0	0
														Fxyd6	0	0	0	0	0	0	0	0	0	0
														Fxyd2	0	0	0	0	0	0	0	0	0	0
														AK014786	0	0	0	0	0	0	0	0	0	0
														Dscaml1	0	0	0	0	1	1	0	0	0	0
														2900052N01Rik	0	0	0	0	0	0	0	0	0	0
														Cadm1	0	0	0	0	1	1	0	0	0	0
														Fam55d	0	0	0	0	0	0	0	0	0	0
														Fam55b	0	0	0	0	0	0	0	0	0	0
														Rexo2	0	0	0	0	0	0	0	0	0	0
														Rbm7	0	0	0	0	0	0	0	0	0	0
														Gm5617	0	0	0	0	0	0	0	0	0	0
														Nnmt	0	0	0	0	0	0	0	0	0	0
														Zbtb16	0	0	0	0	0	0	0	0	0	0
														Spg21	0	0	0	0	0	0	0	0	0	0
														AK153351	0	0	0	0	0	0	0	0	0	0
														Plekho2	0	0	0	0	0	0	0	0	0	0
														AK180939	0	0	0	0	0	0	0	0	0	0
														Pif1	0	0	0	0	0	0	0	0	0	0
														Lipc	0	0	0	0	0	0	0	0	0	0
														Tcf12	0	0	0	0	0	0	0	0	0	0
														AK039014	0	0	0	0	0	0	0	0	0	0
														Zfp280d	0	0	0	0	0	0	0	0	0	0
														AK040357	0	0	0	0	0	0	0	0	0	0
														BC065403	0	0	0	0	0	0	0	0	0	0
														Mns1	0	0	0	0	0	0	0	0	0	0
														Tex9	0	0	0	0	0	0	0	0	0	0
														Rfx7	0	0	0	0	0	0	0	0	0	0
														Nedd4	0	0	0	0	0	0	0	0	0	0
														Prtg	0	0	0	0	0	0	0	0	0	0
														Rab27a	0	0	0	0	0	0	0	0	0	0
														2410004A20Rik	0	0	0	0	0	0	0	0	0	0
														Rsl24d1	0	0	0	0	0	0	0	0	0	0
														Wdr72	0	0	0	0	0	0	0	0	0	0
														Tinag	0	0	0	0	1	1	0	0	0	0
														AK085652	0	0	0	0	0	0	0	0	0	0
														Lrrc1	0	0	0	0	0	0	0	0	0	0
														Klhl31	0	0	0	0	0	0	0	0	0	0
														Plscr1	0	0	0	0	0	0	0	0	0	0
														Plscr2	0	0	0	0	0	0	0	0	0	0
														1700057G04Rik	0	0	0	0	0	0	0	0	0	0
														Plscr4	0	0	0	0	0	0	0	0	0	0
														B430319G15Rik	0	0	0	0	0	0	0	0	0	0
														Plod2	0	0	0	0	0	0	0	0	0	0
														AK018841	0	0	0	0	0	0	0	0	0	0
														Slc9a9	0	0	0	0	0	0	0	0	0	0
														Pcolce2	0	0	0	0	0	0	0	0	0	0
														Trpc1	0	0	0	0	0	0	0	0	0	0
														Pls1	0	0	0	0	0	0	0	0	0	0
														Zbtb38	0	0	0	0	0	0	0	0	0	0
														AK089981	0	0	0	0	0	0	0	0	0	0
														Spsb4	0	0	0	0	0	0	0	0	0	0
														AK085341	0	0	0	0	0	0	0	0	0	0
														Slc25a36	0	0	0	0	0	0	0	0	0	0
														Clstn2	0	0	0	0	1	1	0	0	0	0
														Pccb	0	0	0	0	0	0	0	0	0	0
														Msl2	0	0	0	0	0	0	0	0	0	0
														Ppp2r3a	0	0	0	0	0	0	0	0	0	0
														Nek11	0	0	0	0	0	0	0	0	0	0
														Aste1	0	0	0	0	0	0	0	0	0	0
														Iqcf3	0	0	0	0	0	0	0	0	0	0
														Iqcf4	0	0	0	0	0	0	0	0	0	0
														Tex264	0	0	0	0	0	0	0	0	0	0
														Rad54l2	0	0	0	0	0	0	0	0	0	0
														Hemk1	0	0	0	0	0	0	0	0	0	0
														6430571L13Rik	0	0	0	0	0	0	0	0	0	0
														Tmem115	0	0	0	0	0	0	0	0	0	0
														Cyb561d2	0	0	0	0	0	0	0	0	0	0
														Nprl2	0	0	0	0	0	0	0	0	0	0
														Lrrfip2	0	0	0	0	0	0	0	0	0	0
														Mlh1	0	0	0	0	0	0	0	0	0	0
														Epm2aip1	0	0	0	0	0	0	0	0	0	0
														Trank1	0	0	0	0	0	0	0	0	0	0
														Eomes	0	0	0	0	0	0	0	0	0	0
														Golga4	0	0	0	0	0	0	0	0	0	0
														Scn11a	0	0	0	0	0	0	0	0	0	0
														AK076661	0	0	0	0	0	0	0	0	0	0
														Med7	0	0	0	0	0	0	0	0	0	0
														Vmn2r18	0	0	0	0	0	0	0	0	0	0
														Chrna7	0	0	0	0	0	0	0	0	0	0
														A830018L16Rik	0	0	0	0	0	0	0	0	0	0
														Gm4850	0	0	0	0	0	0	0	0	0	0
														Fam178b	0	0	0	0	0	0	0	0	0	0
														4930594C11Rik	0	0	0	0	0	0	0	0	0	0
														Mir1937b-2	0	0	0	0	0	0	0	0	0	0
														Ankrd44	0	0	0	0	0	0	0	0	0	0
														DQ693259	0	0	0	0	0	0	0	0	0	0
														BC035947	0	0	0	0	0	0	0	0	0	0
														Htr5b	0	0	0	0	0	0	0	0	0	0
														Tnni1	0	0	0	0	0	0	0	0	0	0
														Igfn1	0	0	0	0	0	0	0	0	0	0
														Kcnt2	0	0	0	0	0	0	0	0	0	0
														AB350970	0	0	0	0	0	0	0	0	0	0
														Wdr64	0	0	0	0	0	0	0	0	0	0
														Ipcef1	0	0	0	0	0	0	0	0	0	0
														Gm9767	0	0	0	0	0	0	0	0	0	0
														Fignl1	0	0	0	0	0	0	0	0	0	0
														Gm12034	0	0	0	0	0	0	0	0	0	0
														Havcr2	0	0	0	0	0	0	0	0	0	0
														Gm12169	0	0	0	0	0	0	0	0	0	0
														Gfpt2	0	0	0	0	0	0	0	0	0	0
														Mir804	0	0	0	0	0	0	0	0	0	0
														F930015N05Rik	0	0	0	0	0	0	0	0	0	0
														Mir497	0	0	0	0	0	0	0	0	0	0
														Mir195	0	0	0	0	0	0	0	0	0	0
														0610010K14Rik	0	0	0	0	0	0	0	0	0	0
														AI662270	0	0	0	0	0	0	0	0	0	0
														Gm11529	0	0	0	0	0	0	0	0	0	0
														Gm11938	0	0	0	0	0	0	0	0	0	0
														Gm11562	0	0	0	0	0	0	0	0	0	0
														Gm11563	0	0	0	0	0	0	0	0	0	0
														Gm11595	0	0	0	0	0	0	0	0	0	0
														Tmc8	0	0	0	0	0	0	0	0	0	0
														LOC100316870	0	0	0	0	0	0	0	0	0	0
														AB341946	0	0	0	0	0	0	0	0	0	0
														AB341979	0	0	0	0	0	0	0	0	0	0
														AB341994	0	0	0	0	0	0	0	0	0	0
														AB341998	0	0	0	0	0	0	0	0	0	0
														AB342013	0	0	0	0	0	0	0	0	0	0
														AB342034	0	0	0	0	0	0	0	0	0	0
														Nrxn3	0	0	0	0	0	0	0	0	0	0
														Serpina3i	0	0	0	0	0	0	0	0	0	0
														Serpina3j	0	0	0	0	0	0	0	0	0	0
														Tdrd9	0	0	0	0	0	0	0	0	0	0
														BC048943	0	0	0	0	0	0	0	0	0	0
														abParts	0	0	0	0	0	0	0	0	0	0
														J00476	0	0	0	0	0	0	0	0	0	0
														Cmah	0	0	0	0	0	0	0	0	0	0
														F2rl1	0	0	0	0	0	0	0	0	0	0
														1700024P04Rik	0	0	0	0	0	0	0	0	0	0
														Olfr749	0	0	0	0	0	0	1	1	1	1
														Snord123	0	0	0	0	0	0	0	0	0	0
														AK005410	0	0	0	0	0	0	0	0	0	0
														4933412E24Rik	0	0	0	0	0	0	0	0	0	0
														Enthd1	0	0	0	0	0	0	0	0	0	0
														Synj1	0	0	0	0	0	0	0	0	0	0
														Gcfc1	0	0	0	0	0	0	0	0	0	0
														Prss32	0	0	0	0	0	0	0	0	0	0
														Prss22	0	0	0	0	0	0	0	0	0	0
														Pdpk1	0	0	0	0	0	0	0	0	0	0
														Gm10012	0	0	0	0	0	0	0	0	0	0
														Fgd2	0	0	0	0	0	0	0	0	0	0
														Tmem217	0	0	0	0	0	0	0	0	0	0
														AK002805	0	0	0	0	0	0	0	0	0	0
														Psmb8	0	0	0	1	0	0	0	0	0	0
														H2-Eb2	1	1	1	1	0	0	0	0	0	0
														Btnl3	0	0	0	0	0	0	0	0	0	0
														Btn3a3	0	0	0	0	0	0	0	0	0	0
														Gpsm3	0	0	0	0	0	0	0	0	0	0
														Tnxb	0	0	0	0	1	1	0	0	0	0
														Dom3z	0	0	0	0	0	0	0	0	0	0
														Snord52	0	0	0	0	0	0	0	0	0	0
														Tcf19	0	0	0	0	0	0	0	0	0	0
														Gm9573	0	0	0	0	0	0	0	0	0	0
														Dpcr1	0	0	0	0	0	0	0	0	0	0
														Vars2	0	0	0	0	0	0	0	0	0	0
														Gm6623	0	0	0	0	0	0	0	0	0	0
														AB340047	0	0	0	0	0	0	0	0	0	0
														AB339929	0	0	0	0	0	0	0	0	0	0
														Gm9104	0	0	0	0	0	0	0	0	0	0
														Sult6b1	0	0	0	0	0	0	0	0	0	0
														Thada	0	0	0	0	0	0	0	0	0	0
														Pcdhb22	0	0	0	0	1	1	0	0	0	0
														Kctd16	0	0	0	0	0	0	0	0	0	0
														Loxhd1	0	0	0	0	0	0	0	0	0	1
														A330040F15Rik	0	0	0	0	0	0	0	0	0	0
														Gm4952	0	0	0	0	0	0	0	0	0	0
														Mir204	0	0	0	0	0	0	0	0	0	0
														Dmrt1	0	0	0	0	0	0	0	0	0	0
														Mir107	0	0	0	0	0	0	0	0	0	0
														Cyp26c1	0	0	0	0	0	0	0	0	0	0
														Got1	0	0	0	0	0	0	0	0	0	0
														D19Ertd652e	0	0	0	0	0	0	0	0	0	0
														Mir669e	0	0	0	0	0	0	0	0	0	0
														Mir669b	0	0	0	0	0	0	0	0	0	0
														Mir4660	0	0	0	0	0	0	0	0	0	0
														Mir669a-3	0	0	0	0	0	0	0	0	0	0
														Mir669k	0	0	0	0	0	0	0	0	0	0
														Mir467a-1	0	0	0	0	0	0	0	0	0	0
														Mir669a-2	0	0	0	0	0	0	0	0	0	0
														Mir669g	0	0	0	0	0	0	0	0	0	0
														Mir669j	0	0	0	0	0	0	0	0	0	0
														Mir467a-1	0	0	0	0	0	0	0	0	0	0
														Mir669a-2	0	0	0	0	0	0	0	0	0	0
														Mir467b	0	0	0	0	0	0	0	0	0	0
														Mir669a-2	0	0	0	0	0	0	0	0	0	0
														Mir467a-3	0	0	0	0	0	0	0	0	0	0
														Mir669a-2	0	0	0	0	0	0	0	0	0	0
														Mir467a-1	0	0	0	0	0	0	0	0	0	0
														Mir669a-2	0	0	0	0	0	0	0	0	0	0
														Mir467a-1	0	0	0	0	0	0	0	0	0	0
														Mir699p-1	0	0	0	0	0	0	0	0	0	0
														Mir467a-1	0	0	0	0	0	0	0	0	0	0
														Mir669a-2	0	0	0	0	0	0	0	0	0	0
														Mir467a-1	0	0	0	0	0	0	0	0	0	0
														Mir669a-2	0	0	0	0	0	0	0	0	0	0
														Mir467a-1	0	0	0	0	0	0	0	0	0	0
														Mir699p-1	0	0	0	0	0	0	0	0	0	0
														Mir467a-1	0	0	0	0	0	0	0	0	0	0
														Mir669a-2	0	0	0	0	0	0	0	0	0	0
														Mir467a-1	0	0	0	0	0	0	0	0	0	0
														Mir669a-2	0	0	0	0	0	0	0	0	0	0
														Mir467a-1	0	0	0	0	0	0	0	0	0	0
														Mir669a-1	0	0	0	0	0	0	0	0	0	0
														Prdm11	0	0	0	0	0	0	0	0	0	0
														4631405J19Rik	0	0	0	0	0	0	0	0	0	0
														Wfdc6a	0	0	0	0	0	0	0	0	0	0
														Wfdc16	0	0	0	0	0	0	0	0	0	0
														2010011I20Rik	0	0	0	0	0	0	0	0	0	0
														Mir1-1	0	0	0	0	0	0	0	0	0	0
														Mir133a-2	0	0	0	0	0	0	0	0	0	0
														Zbtb46	0	0	0	0	0	0	0	0	0	0
														C030034L19Rik	0	0	0	0	0	0	0	0	0	0
														Zfp704	0	0	0	0	0	0	0	0	0	0
														Samd7	0	0	0	0	0	0	0	0	0	0
														Kcnn3	0	0	0	0	0	0	0	0	0	0
														S100a2	0	0	0	0	0	0	0	0	0	0
														Sprr2a1	0	0	0	0	0	0	0	0	0	0
														Sprr2a1	0	0	0	0	0	0	0	0	0	0
														Pde4dip	0	0	0	0	0	0	0	0	0	0
														Spag17	0	0	0	0	0	0	0	0	0	0
														Cd101	0	0	0	0	0	0	0	0	0	0
														A930005H10Rik	0	0	0	0	0	0	0	0	0	0
														Mir137	0	0	0	0	0	0	0	0	0	0
														Ttll7	0	0	0	0	0	0	0	0	0	0
														Grin3a	0	0	0	0	0	0	0	0	0	0
														Magi2	0	0	0	0	0	0	0	0	0	0
														Gm5294	0	0	0	0	0	0	0	0	0	0
														Mir182	0	0	0	0	0	0	0	0	0	0
														Mir96	0	0	0	0	0	0	0	0	0	0
														Mir183	0	0	0	0	0	0	0	0	0	0
														Mir490	0	0	0	0	0	0	0	0	0	0
														Cpvl	0	0	0	0	0	0	0	0	0	0
														abParts	0	0	0	0	0	0	0	0	0	0
														AK039686	0	0	0	0	0	0	0	0	0	0
														Psg20	0	0	0	0	0	0	0	0	0	0
														Sycp1-ps1	0	0	0	0	0	0	0	0	0	0
														Nova2	0	0	0	0	0	0	0	0	0	0
														1700028B04Rik	0	0	0	0	0	0	0	0	0	0
														Capn12	0	0	0	0	0	0	0	0	0	0
														Mir1963	0	0	0	0	0	0	0	0	0	0
														Fam98c	0	0	0	0	0	0	0	0	0	0
														E130304I02Rik	0	0	0	0	0	0	0	0	0	0
														EU599041	0	0	0	0	0	0	0	0	0	0
														Cd33	0	0	0	0	1	1	0	0	0	0
														Mir326	0	0	0	0	0	0	0	0	0	0
														Olfr628	0	0	0	0	0	0	1	1	1	1
														Gm5736	0	0	0	0	0	0	0	0	0	0
														Olfr65	0	0	0	0	0	0	1	1	1	1
														4931431F19Rik	0	0	0	0	0	0	0	0	0	0
														2310008H09Rik	0	0	0	0	0	0	0	0	0	0
														4930571K23Rik	0	0	0	0	0	0	0	0	0	0
														Mir3103	0	0	0	0	0	0	0	0	0	0
														EG434280	0	0	0	0	0	0	0	0	0	0
														Dlgap2	0	0	0	0	0	0	0	0	0	0
														Gm3985	0	0	0	0	0	0	0	0	0	0
														Snx25	0	0	0	0	0	0	0	0	0	0
														Galntl6	0	0	0	0	0	0	0	0	0	0
														LOC100271928	0	0	0	0	0	0	0	0	0	0
														Gm4975	0	0	0	0	0	0	0	0	0	0
														0610038B21Rik	0	0	0	0	0	0	0	0	0	0
														Cotl1	0	0	0	0	0	0	0	0	0	0
														Dpy19l1	0	0	0	0	0	0	0	0	0	0
														Olfr976	0	0	0	0	0	0	1	1	1	1
														Gm8884	0	0	0	0	0	0	0	0	0	0
														DQ072391	0	0	0	0	0	0	0	0	0	0
														Fam46a	0	0	0	0	0	0	0	0	0	0
														Plscr5	0	0	0	0	0	0	0	0	0	0
														Iqcf6	0	0	0	0	0	0	0	0	0	0
														Grm2	0	0	0	0	0	0	0	0	0	0
														Cacna2d2	0	0	0	0	0	0	0	0	0	0
														GO:0042613	MHC class II protein complex
														GO:0042611	MHC protein complex
														GO:0002504	antigen processing and presentation of peptide or polysaccharide antigen via MHC class II
														GO:0019882	antigen processing and presentation
														GO:0007155	cell adhesion
														GO:0022610	biological adhesion
														GO:0004984	olfactory receptor activity
														GO:0007608	sensory perception of smell
														GO:0007606	sensory perception of chemical stimulus
														GO:0007600	sensory perception

## Sheet: Cze dDaf
no results		AF251705
		Frs3
		Polr1b
		Gtpbp2
		Xkr4
		Ncoa2
		AK171953
		Serpinb3c
		Serpinb11
		AK043174
		Cntnap5a
		Insig2
		Dpp10
		Ppp1r15b
		Plekha6
		AK145464
		Ren1
		Etnk2
		Sox13
		Cacna1e
		Fam5b
		Astn1
		Cdc42bpa
		Oprm1
		2610035D17Rik
		Cd300a
		Cd300lb
		Cd300c
		Cd300ld
		Gm11711
		Gm11711
		Fhit
		AK135997
		Clybl
		1700108J01Rik
		Zfat
		Trappc9
		Peg13
		AK033170
		Setd4
		Cbr1
		Myo1f
		Zfp414
		Pram1
		Hnrnpm
		2012-03-02
		Rab11b
		AK133808
		Angptl4
		Mrps18a
		Rsph9
		Mad2l1bp
		Polh
		Xpo5
		Polr1c
		Yipf3
		Tjap1
		Tjap1
		Usp49
		AK076701
		Pgc
		Tcfeb
		AK203938
		Mdfi
		Lama1
		Arhgap28
		Crim1
		Fez2
		Cdc42ep3
		Arap3
		Htr4
		Haus1
		Atp5a1
		AK172459
		Pstpip2
		5430411K18Rik
		Adrb1
		DQ715973
		A630007B06Rik
		Tdrd1
		Gata3
		4930412O13Rik
		AK020309
		AK085384
		Fmnl2
		Ttl
		Chchd5
		AK184713
		Slc20a1
		AK042900
		Ckap2l
		AK042010
		Il1a
		AK040035
		Slc24a3
		Gm14092
		Col11a1
		Grik3
		Ftl2
		Vkorc1l1
		Gusb
		Asl
		AK212710
		Crcp
		Tpst1
		Stard13
		Kcnd2
		Chchd3
		Mgam
		Moxd2
		AF479018
		BC048599
		Plekha8
		2410066E13Rik
		Magi1
		Slc25a26
		Lrig1
		Cntn6
		AK145340
		AK046042
		Cntn4
		Hrh1
		Efcab4b
		Prmt8
		Eps8
		Igbp1b
		Lgals4
		Lgals7
		Actn4
		Eif3k
		Map4k1
		Ryr1
		Mesdc1
		Mesdc2
		9930013L23Rik
		Spon1
		Calca
		Calcb
		Xylt1
		Csmd1
		AK139810
		Ntm
		Olfr881
		Olfr883
		Olfr884
		Olfr885
		Olfr887
		Olfr888
		Olfr889
		Pik3c2b
		Mir488
		Ipcef1
		abParts
		Fam172a
		Pou5f2
		Mir693
		Gm88
		Tomm6
		Fbxo38
		Capn12
		Galntl6
		LOC100271928

[truncated: 3 more sheets: Kaz XPCLR, Kaz Rsbl, Kaz dDAF]
